# Supplementary material for: Transcriptome Profile of Human Fibroblasts in an Ex Vivo Culture
Source: PubMed Central journal article supplement (PMC6945561; doi:10.7150/ijms.35693), 2020-01-01
Supplement: ijmsv17p0125s1.pdf [file ijmsv17p0125s1.pdf]

Table S1. Complete list of up- and down-regulated genes in C1 cells.

| Direction in C1 cells | Gene symbol | Gene name                                                                        | Entrez Gene ID | Fold change C1 vs C0 |
|-----------------------|-------------|----------------------------------------------------------------------------------|----------------|----------------------|
| up                    | EDN1        | endothelin 1                                                                     | 1906           | 10,09                |
| up                    | ANKRD1      | ankyrin repeat domain 1 (cardiac muscle)                                         | 27063          | 5,95                 |
| up                    | SCUBE3      | signal peptide, CUB domain, EGF-like 3                                           | 222663         | 5,38                 |
| up                    | HAPLN3      | hyaluronan and proteoglycan link protein 3                                       | 145864         | 4,47                 |
| up                    | SLC7A5      | solute carrier family 7 (amino acid transporter light chain, L system), member 5 | 8140           | 4,23                 |
| up                    | MARCH4      | membrane-associated ring finger (C3HC4) 4, E3 ubiquitin protein ligase           | 57574          | 3,91                 |
| up                    | PSAT1       | phosphoserine aminotransferase 1                                                 | 29968          | 3,86                 |
| up                    | KRTAP2-3    | keratin associated protein 2-3                                                   | 730755         | 3,76                 |
| up                    | HSPB7       | heat shock 27kDa protein family, member 7 (cardiovascular)                       | 27129          | 3,74                 |
| up                    | OXTR        | oxytocin receptor                                                                | 5021           | 3,52                 |
| up                    | ASNS        | asparagine synthetase (glutamine-hydrolyzing)                                    | 440            | 3,39                 |
| up                    | KRTAP1-5    | keratin associated protein 1-5                                                   | 83895          | 3,27                 |
| up                    | CHAC1       | ChaC, cation transport regulator homolog 1 (E, coli)                             | 79094          | 3,22                 |
| up                    | DCLK2       | doublecortin-like kinase 2                                                       | 166614         | 3,15                 |
| up                    | SLC16A4     | solute carrier family 16, member 4                                               | 9122           | 3,08                 |
| up                    | LGR5        | leucine-rich repeat containing G protein-coupled receptor 5                      | 8549           | 2,99                 |
| up                    | COL4A1      | collagen, type IV, alpha 1                                                       | 1282           | 2,94                 |
| up                    | POTEI       | POTE ankyrin domain family, member I                                             | 653269         | 2,89                 |
| up                    | GSTT2       | glutathione S-transferase theta 2                                                | 2953           | 2,84                 |
| up                    | ULBP1       | UL16 binding protein 1                                                           | 80329          | 2,81                 |
| up                    | TPM1        | tropomyosin 1 (alpha)                                                            | 7168           | 2,78                 |
| up                    | CHRM2       | cholinergic receptor, muscarinic 2                                               | 1129           | 2,77                 |
| up                    | PDLIM5      | PDZ and LIM domain 5                                                             | 10611          | 2,76                 |
| up                    | PLN         | phospholamban                                                                    | 5350           | 2,75                 |
| up                    | ADIRF       | adipogenesis regulatory factor                                                   | 10974          | 2,72                 |
| up                    | ELN         | elastin                                                                          | 2006           | 2,71                 |
| up                    | SYNPO2      | synaptopodin 2                                                                   | 171024         | 2,68                 |
| up                    | B3GALT2     | UDP-Gal:betaGlcNAc beta 1,3-galactosyltransferase, polypeptide 2                 | 8707           | 2,67                 |
| up                    | CDH8        | cadherin 8, type 2                                                               | 1006           | 2,66                 |
| up                    | FCGR1B      | Fc fragment of IgG, high affinity Ib, receptor (CD64)                            | 2210           | 2,64                 |
| up                    | MALL        | mal, T-cell differentiation protein-like                                         | 7851           | 2,62                 |
| up                    | CALD1       | caldesmon 1                                                                      | 800            | 2,52                 |
| up                    | TM4SF1      | transmembrane 4 L six family member 1                                            | 4071           | 2,52                 |
| up                    | GPC4        | glypican 4                                                                       | 2239           | 2,46                 |
| up                    | STC2        | stanniocalcin 2                                                                  | 8614           | 2,45                 |
| up                    | ITGA8       | integrin, alpha 8                                                                | 8516           | 2,44                 |

|    |          |                                                                                             |           |      |
|----|----------|---------------------------------------------------------------------------------------------|-----------|------|
| up | LGMN     | legumain                                                                                    | 5641      | 2,43 |
| up | SEL1L3   | sel-1 suppressor of lin-12-like 3 (C, elegans)                                              | 23231     | 2,43 |
| up | SOX9     | SRY (sex determining region Y)-box 9                                                        | 6662      | 2,43 |
| up | MIR3191  | microRNA 3191                                                                               | 100422832 | 2,43 |
| up | SRGN     | serglycin                                                                                   | 5552      | 2,42 |
| up | CXorf56  | chromosome X open reading frame 56                                                          | 63932     | 2,42 |
| up | GLS      | glutaminase                                                                                 | 2744      | 2,39 |
| up | LRRC37A2 | leucine rich repeat containing 37, member A2                                                | 474170    | 2,38 |
| up | TSPAN18  | tetraspanin 18                                                                              | 90139     | 2,38 |
| up | RASA4    | RAS p21 protein activator 4                                                                 | 10156     | 2,38 |
| up | FAM101B  | family with sequence similarity 101, member B                                               | 359845    | 2,36 |
| up | PPP1R3C  | protein phosphatase 1, regulatory subunit 3C                                                | 5507      | 2,34 |
| up | GREM2    | gremlin 2, DAN family BMP antagonist                                                        | 64388     | 2,33 |
| up | PHGDH    | phosphoglycerate dehydrogenase                                                              | 26227     | 2,33 |
| up | GATA6    | GATA binding protein 6                                                                      | 2627      | 2,31 |
| up | OR8H3    | olfactory receptor, family 8, subfamily H, member 3                                         | 390152    | 2,28 |
| up | SLC7A11  | solute carrier family 7 (anionic amino acid transporter light chain, xc- system), member 11 | 23657     | 2,28 |
| up | VASP     | vasodilator-stimulated phosphoprotein                                                       | 7408      | 2,25 |
| up | LYPD6B   | LY6/PLAUR domain containing 6B                                                              | 130576    | 2,25 |
| up | AFF3     | AF4/FMR2 family, member 3                                                                   | 3899      | 2,24 |
| up | PDLIM7   | PDZ and LIM domain 7 (enigma)                                                               | 9260      | 2,24 |
| up | C5orf28  | chromosome 5 open reading frame 28                                                          | 64417     | 2,23 |
| up | LUZP2    | leucine zipper protein 2                                                                    | 338645    | 2,22 |
| up | C19orf25 | chromosome 19 open reading frame 25                                                         | 148223    | 2,20 |
| up | PSMD3    | proteasome (prosome, macropain) 26S subunit, non-ATPase, 3                                  | 5709      | 2,20 |
| up | DSP      | desmoplakin                                                                                 | 1832      | 2,19 |
| up | C11orf87 | chromosome 11 open reading frame 87                                                         | 399947    | 2,19 |
| up | SASS6    | spindle assembly 6 homolog (C, elegans)                                                     | 163786    | 2,18 |
| up | CDH2     | cadherin 2, type 1, N-cadherin (neuronal)                                                   | 1000      | 2,17 |
| up | BMP6     | bone morphogenetic protein 6                                                                | 654       | 2,17 |
| up | PCK2     | phosphoenolpyruvate carboxykinase 2 (mitochondrial)                                         | 5106      | 2,17 |
| up | ASPN     | asporin                                                                                     | 54829     | 2,16 |
| up | LTB4R2   | leukotriene B4 receptor 2                                                                   | 56413     | 2,16 |
| up | PPP2R2B  | protein phosphatase 2, regulatory subunit B, beta                                           | 5521      | 2,14 |
| up | FAM43A   | family with sequence similarity 43, member A                                                | 131583    | 2,13 |
| up | TES      | testis derived transcript (3 LIM domains)                                                   | 26136     | 2,10 |
| up | NOTCH3   | notch 3                                                                                     | 4854      | 2,10 |
| up | LMO7     | LIM domain 7                                                                                | 4008      | 2,10 |
| up | ALDH1B1  | aldehyde dehydrogenase 1 family, member B1                                                  | 219       | 2,10 |
| up | SPOCD1   | SPOC domain containing 1                                                                    | 90853     | 2,08 |

|      |          |                                                                                    |        |       |
|------|----------|------------------------------------------------------------------------------------|--------|-------|
| up   | SLC16A3  | solute carrier family 16 (monocarboxylate transporter), member 3                   | 9123   | 2,07  |
| up   | IGKV@    | immunoglobulin kappa variable cluster                                              | 3519   | 2,07  |
| up   | POTEG    | POTE ankyrin domain family, member G                                               | 404785 | 2,07  |
| up   | SPDL1    | spindle apparatus coiled-coil protein 1                                            | 54908  | 2,07  |
| up   | WFDC1    | WAP four-disulfide core domain 1                                                   | 58189  | 2,06  |
| up   | TWISTNB  | TWIST neighbor                                                                     | 221830 | 2,06  |
| up   | CNKSR2   | connector enhancer of kinase suppressor of Ras 2                                   | 22866  | 2,06  |
| up   | TIPARP   | TCDD-inducible poly(ADP-ribose) polymerase                                         | 25976  | 2,06  |
| up   | NPAS2    | neuronal PAS domain protein 2                                                      | 4862   | 2,04  |
| up   | MIR614   | microRNA 614                                                                       | 693199 | 2,04  |
| up   | ZNF595   | zinc finger protein 595                                                            | 152687 | 2,04  |
| up   | ITGA11   | integrin, alpha 11                                                                 | 22801  | 2,03  |
| up   | COL8A1   | collagen, type VIII, alpha 1                                                       | 1295   | 2,03  |
| up   | ACTA2    | actin, alpha 2, smooth muscle, aorta                                               | 59     | 2,03  |
| up   | ENTPD4   | ectonucleoside triphosphate diphosphohydrolase 4                                   | 9583   | 2,03  |
| up   | ABCC3    | ATP-binding cassette, sub-family C (CFTR/MRP), member 3                            | 8714   | 2,03  |
| up   | ALG14    | ALG14, UDP-N-acetylglucosaminyltransferase subunit                                 | 199857 | 2,02  |
| up   | SLC2A3   | solute carrier family 2 (facilitated glucose transporter), member 3                | 6515   | 2,02  |
| up   | OR4D10   | olfactory receptor, family 4, subfamily D, member 10                               | 390197 | 2,01  |
| up   | PAWR     | PRKC, apoptosis, WT1, regulator                                                    | 5074   | 2,00  |
| up   | DKK1     | dickkopf WNT signaling pathway inhibitor 1                                         | 22943  | 2,00  |
| down | PPAP2B   | phosphatidic acid phosphatase type 2B                                              | 8613   | -2,01 |
| down | KIR3DL1  | killer cell immunoglobulin-like receptor, three domains, long cytoplasmic tail, 1  | 3811   | -2,01 |
| down | NFKBIZ   | nuclear factor of kappa light polypeptide gene enhancer in B-cells inhibitor, zeta | 64332  | -2,01 |
| down | OXT      | oxytocin/neurophysin I prepropeptide                                               | 5020   | -2,01 |
| down | LRRN4CL  | LRRN4 C-terminal like                                                              | 221091 | -2,02 |
| down | SERPING1 | serpin peptidase inhibitor, clade G (C1 inhibitor), member 1                       | 710    | -2,02 |
| down | SOD3     | superoxide dismutase 3, extracellular                                              | 6649   | -2,03 |
| down | PPARGC1A | peroxisome proliferator-activated receptor gamma, coactivator 1 alpha              | 10891  | -2,03 |
| down | MXD3     | MAX dimerization protein 3                                                         | 83463  | -2,03 |
| down | BMPER    | BMP binding endothelial regulator                                                  | 168667 | -2,04 |
| down | DNM1     | dynamin 1                                                                          | 1759   | -2,05 |
| down | C1S      | complement component 1, s subcomponent                                             | 716    | -2,05 |
| down | SVEP1    | sushi, von Willebrand factor type A, EGF and pentraxin domain containing 1         | 79987  | -2,06 |
| down | CLIC2    | chloride intracellular channel 2                                                   | 1193   | -2,07 |
| down | ZNF563   | zinc finger protein 563                                                            | 147837 | -2,07 |
| down | FADS1    | fatty acid desaturase 1                                                            | 3992   | -2,07 |

|      |          |                                                                                   |        |       |
|------|----------|-----------------------------------------------------------------------------------|--------|-------|
| down | ZNF608   | zinc finger protein 608                                                           | 57507  | -2,10 |
| down | CRABP2   | cellular retinoic acid binding protein 2                                          | 1382   | -2,10 |
| down | ZNF14    | zinc finger protein 14                                                            | 7561   | -2,11 |
| down | CELF2    | CUGBP, Elav-like family member 2                                                  | 10659  | -2,11 |
| down | TMTC1    | transmembrane and tetratricopeptide repeat containing 1                           | 83857  | -2,11 |
| down | PTGFR    | prostaglandin F receptor (FP)                                                     | 5737   | -2,11 |
| down | UBC      | ubiquitin C                                                                       | 7316   | -2,12 |
| down | SLC9A9   | solute carrier family 9, subfamily A (NHE9, cation proton antiporter 9), member 9 | 285195 | -2,12 |
| down | SCPEP1   | serine carboxypeptidase 1                                                         | 59342  | -2,13 |
| down | TCEAL3   | transcription elongation factor A (SII)-like 3                                    | 85012  | -2,13 |
| down | IGSF10   | immunoglobulin superfamily, member 10                                             | 285313 | -2,14 |
| down | SLC40A1  | solute carrier family 40 (iron-regulated transporter), member 1                   | 30061  | -2,14 |
| down | DKK2     | dickkopf WNT signaling pathway inhibitor 2                                        | 27123  | -2,15 |
| down | FLT3LG   | fms-related tyrosine kinase 3 ligand                                              | 2323   | -2,15 |
| down | ZNF436   | zinc finger protein 436                                                           | 80818  | -2,15 |
| down | COL14A1  | collagen, type XIV, alpha 1                                                       | 7373   | -2,15 |
| down | JUN      | jun proto-oncogene                                                                | 3725   | -2,16 |
| down | PRSS36   | protease, serine, 36                                                              | 146547 | -2,18 |
| down | DPT      | dermatopontin                                                                     | 1805   | -2,18 |
| down | SCARA3   | scavenger receptor class A, member 3                                              | 51435  | -2,19 |
| down | PDE7B    | phosphodiesterase 7B                                                              | 27115  | -2,22 |
| down | ATAD3B   | ATPase family, AAA domain containing 3B                                           | 83858  | -2,23 |
| down | INSIG1   | insulin induced gene 1                                                            | 3638   | -2,23 |
| down | SAMHD1   | SAM domain and HD domain 1                                                        | 25939  | -2,24 |
| down | IGLV3-10 | immunoglobulin lambda variable 3-10                                               | ---    | -2,25 |
| down | HSPA6    | heat shock 70kDa protein 6 (HSP70B)                                               | 3310   | -2,25 |
| down | FBLN7    | fibulin 7                                                                         | 129804 | -2,26 |
| down | ENPP2    | ectonucleotide pyrophosphatase/phosphodiesterase 2                                | 5168   | -2,27 |
| down | DHCR24   | 24-dehydrocholesterol reductase                                                   | 1718   | -2,29 |
| down | MYO1D    | myosin ID                                                                         | 4642   | -2,29 |
| down | DCN      | decorin                                                                           | 1634   | -2,30 |
| down | GLUD1    | glutamate dehydrogenase 1                                                         | 2746   | -2,31 |
| down | CTSK     | cathepsin K                                                                       | 1513   | -2,32 |
| down | RRP7B    | ribosomal RNA processing 7 homolog B (S, cerevisiae)                              | 91695  | -2,33 |
| down | TNXB     | tenascin XB                                                                       | 7148   | -2,34 |
| down | FAP      | fibroblast activation protein, alpha                                              | 2191   | -2,35 |
| down | FBLN1    | fibulin 1                                                                         | 2192   | -2,37 |
| down | OR56A5   | olfactory receptor, family 56, subfamily A, member 5                              | 390084 | -2,37 |
| down | GPNMB    | glycoprotein (transmembrane) nmb                                                  | 10457  | -2,38 |

|      |           |                                                                                        |           |       |
|------|-----------|----------------------------------------------------------------------------------------|-----------|-------|
| down | BRINP1    | bone morphogenetic protein/retinoic acid inducible neural-specific 1                   | 1620      | -2,39 |
| down | ICAM1     | intercellular adhesion molecule 1                                                      | 3383      | -2,40 |
| down | ABCA8     | ATP-binding cassette, sub-family A (ABC1), member 8                                    | 10351     | -2,40 |
| down | IL1R1     | interleukin 1 receptor, type I                                                         | 3554      | -2,41 |
| down | SREBF1    | sterol regulatory element binding transcription factor 1                               | 6720      | -2,42 |
| down | SLC7A8    | solute carrier family 7 (amino acid transporter light chain, L system), member 8       | 23428     | -2,42 |
| down | VCX3B     | variable charge, X-linked 3B                                                           | 425054    | -2,42 |
| down | STC1      | stanniocalcin 1                                                                        | 6781      | -2,44 |
| down | APCDD1    | adenomatosis polyposis coli down-regulated 1                                           | 147495    | -2,45 |
| down | HAUS7     | HAUS augmin-like complex, subunit 7                                                    | 55559     | -2,46 |
| down | PLXNC1    | plexin C1                                                                              | 10154     | -2,49 |
| down | NRN1      | neuritin 1                                                                             | 51299     | -2,50 |
| down | SCD       | stearoyl-CoA desaturase (delta-9-desaturase)                                           | 6319      | -2,51 |
| down | RNPS1     | RNA binding protein S1, serine-rich domain                                             | 10921     | -2,52 |
| down | OAF       | OAF homolog (Drosophila)                                                               | 220323    | -2,53 |
| down | CTSL      | cathepsin L                                                                            | 1514      | -2,54 |
| down | SRSF7     | serine/arginine-rich splicing factor 7                                                 | 6432      | -2,54 |
| down | KCND2     | potassium voltage-gated channel, Shal-related subfamily, member 2                      | 3751      | -2,56 |
| down | FLJ38717  | FLJ38717 protein                                                                       | 401261    | -2,56 |
| down | MAFB      | v-maf avian musculoaponeurotic fibrosarcoma oncogene homolog B                         | 9935      | -2,59 |
| down | CCL2      | chemokine (C-C motif) ligand 2                                                         | 6347      | -2,63 |
| down | SFRP1     | secreted frizzled-related protein 1                                                    | 6422      | -2,64 |
| down | PTGS2     | prostaglandin-endoperoxide synthase 2 (prostaglandin G/H synthase and cyclooxygenase)  | 5743      | -2,66 |
| down | SEMA3A    | sema domain, immunoglobulin domain (Ig), short basic domain, secreted, (semaphorin) 3A | 10371     | -2,66 |
| down | MME       | membrane metallo-endopeptidase                                                         | 4311      | -2,72 |
| down | IFITM1    | interferon induced transmembrane protein 1                                             | 8519      | -2,72 |
| down | CLU       | clusterin                                                                              | 1191      | -2,74 |
| down | TNFSF10   | tumor necrosis factor (ligand) superfamily, member 10                                  | 8743      | -2,81 |
| down | LCE2A     | late cornified envelope 2A                                                             | 353139    | -2,86 |
| down | HIST1H2BM | histone cluster 1, H2bm                                                                | 8342      | -2,87 |
| down | FMOD      | fibromodulin                                                                           | 2331      | -2,94 |
| down | KIT       | v-kit Hardy-Zuckerman 4 feline sarcoma viral oncogene homolog                          | 3815      | -2,96 |
| down | LRRC32    | leucine rich repeat containing 32                                                      | 2615      | -2,99 |
| down | MIR1247   | microRNA 1247                                                                          | 100302145 | -2,99 |
| down | CCBE1     | collagen and calcium binding EGF domains 1                                             | 147372    | -2,99 |
| down | ANGPTL2   | angiotensin-like 2                                                                     | 23452     | -3,00 |

|      |           |                                                                                                        |        |        |
|------|-----------|--------------------------------------------------------------------------------------------------------|--------|--------|
| down | SERPINF1  | serpin peptidase inhibitor, clade F (alpha-2 antiplasmin, pigment epithelium derived factor), member 1 | 5176   | -3,09  |
| down | C3        | complement component 3                                                                                 | 718    | -3,14  |
| down | PTGDS     | prostaglandin D2 synthase 21kDa (brain)                                                                | 5730   | -3,16  |
| down | AKAP12    | A kinase (PRKA) anchor protein 12                                                                      | 9590   | -3,16  |
| down | KLF4      | Kruppel-like factor 4 (gut)                                                                            | 9314   | -3,28  |
| down | MAP1LC3B2 | microtubule-associated protein 1 light chain 3 beta 2                                                  | 643246 | -3,35  |
| down | PDGFRL    | platelet-derived growth factor receptor-like                                                           | 5157   | -3,36  |
| down | ADH1B     | alcohol dehydrogenase 1B (class I), beta polypeptide                                                   | 125    | -3,38  |
| down | IL13RA2   | interleukin 13 receptor, alpha 2                                                                       | 3598   | -3,48  |
| down | CDON      | cell adhesion associated, oncogene regulated                                                           | 50937  | -3,57  |
| down | PRELP     | proline/arginine-rich end leucine-rich repeat protein                                                  | 5549   | -3,62  |
| down | WISP2     | WNT1 inducible signaling pathway protein 2                                                             | 8839   | -3,62  |
| down | ABCA6     | ATP-binding cassette, sub-family A (ABC1), member 6                                                    | 23460  | -3,74  |
| down | RSPO3     | R-spondin 3                                                                                            | 84870  | -4,14  |
| down | COLEC12   | collectin sub-family member 12                                                                         | 81035  | -4,14  |
| down | FOSB      | FBJ murine osteosarcoma viral oncogene homolog B                                                       | 2354   | -4,16  |
| down | ABCA9     | ATP-binding cassette, sub-family A (ABC1), member 9                                                    | 10350  | -4,29  |
| down | APOD      | apolipoprotein D                                                                                       | 347    | -4,30  |
| down | RCAN2     | regulator of calcineurin 2                                                                             | 10231  | -5,30  |
| down | PDGFD     | platelet derived growth factor D                                                                       | 80310  | -5,37  |
| down | MMP1      | matrix metalloproteinase 1 (interstitial collagenase)                                                  | 4312   | -7,29  |
| down | DPP4      | dipeptidyl-peptidase 4                                                                                 | 1803   | -10,99 |

Table S2. Complete list of up- and down-regulated genes in C2 cells.

| Direction in C2 cells | Gene symbol | Gene name                                                                        | Entrez Gene ID | Fold change C2 vs C0 |
|-----------------------|-------------|----------------------------------------------------------------------------------|----------------|----------------------|
| up                    | ANKRD1      | ankyrin repeat domain 1 (cardiac muscle)                                         | 27063          | 15,34                |
| up                    | ASPN        | asporin                                                                          | 54829          | 14,50                |
| up                    | ITGA8       | integrin, alpha 8                                                                | 8516           | 14,40                |
| up                    | SRGN        | serglycin                                                                        | 5552           | 9,67                 |
| up                    | MSTN        | myostatin                                                                        | 2660           | 9,15                 |
| up                    | HAPLN3      | hyaluronan and proteoglycan link protein 3                                       | 145864         | 8,98                 |
| up                    | COL11A1     | collagen, type XI, alpha 1                                                       | 1301           | 8,34                 |
| up                    | FLG         | filaggrin                                                                        | 2312           | 8,23                 |
| up                    | SCUBE3      | signal peptide, CUB domain, EGF-like 3                                           | 222663         | 7,56                 |
| up                    | LGR5        | leucine-rich repeat containing G protein-coupled receptor 5                      | 8549           | 7,30                 |
| up                    | TM4SF20     | transmembrane 4 L six family member 20                                           | 79853          | 6,93                 |
| up                    | KRTAP2-3    | keratin associated protein 2-3                                                   | 730755         | 6,79                 |
| up                    | B3GALT2     | UDP-Gal:betaGlcNAc beta 1,3-galactosyltransferase, polypeptide 2                 | 8707           | 6,76                 |
| up                    | NOTCH3      | notch 3                                                                          | 4854           | 6,55                 |
| up                    | OXTR        | oxytocin receptor                                                                | 5021           | 6,30                 |
| up                    | SLC7A5      | solute carrier family 7 (amino acid transporter light chain, L system), member 5 | 8140           | 6,01                 |
| up                    | ELN         | elastin                                                                          | 2006           | 5,88                 |
| up                    | VLDLR       | very low density lipoprotein receptor                                            | 7436           | 5,72                 |
| up                    | COL4A1      | collagen, type IV, alpha 1                                                       | 1282           | 5,53                 |
| up                    | PHKA1       | phosphorylase kinase, alpha 1 (muscle)                                           | 5255           | 5,34                 |
| up                    | KRTAP1-5    | keratin associated protein 1-5                                                   | 83895          | 5,24                 |
| up                    | HTR2A       | 5-hydroxytryptamine (serotonin) receptor 2A, G protein-coupled                   | 3356           | 5,06                 |
| up                    | EDN1        | endothelin 1                                                                     | 1906           | 5,04                 |
| up                    | MAMDC2      | MAM domain containing 2                                                          | 256691         | 5,01                 |
| up                    | GATA6       | GATA binding protein 6                                                           | 2627           | 4,78                 |
| up                    | BNIP3       | BCL2/adenovirus E1B 19kDa interacting protein 3                                  | 664            | 4,61                 |
| up                    | TES         | testis derived transcript (3 LIM domains)                                        | 26136          | 4,57                 |
| up                    | KCTD20      | potassium channel tetramerization domain containing 20                           | 222658         | 4,50                 |
| up                    | AKAP6       | A kinase (PRKA) anchor protein 6                                                 | 9472           | 4,42                 |
| up                    | PSAT1       | phosphoserine aminotransferase 1                                                 | 29968          | 4,33                 |
| up                    | ACAN        | aggrecan                                                                         | 176            | 4,27                 |
| up                    | LUZP2       | leucine zipper protein 2                                                         | 338645         | 4,23                 |
| up                    | SLC2A1      | solute carrier family 2 (facilitated glucose transporter), member 1              | 6513           | 4,19                 |
| up                    | SYNPO2      | synaptopodin 2                                                                   | 171024         | 4,14                 |
| up                    | WFDC1       | WAP four-disulfide core domain 1                                                 | 58189          | 4,13                 |
| up                    | CNN1        | calponin 1, basic, smooth muscle                                                 | 1264           | 4,11                 |

|    |           |                                                                        |           |      |
|----|-----------|------------------------------------------------------------------------|-----------|------|
| up | GPC4      | glypican 4                                                             | 2239      | 4,10 |
| up | ITGA6     | integrin, alpha 6                                                      | 3655      | 4,05 |
| up | MARCH4    | membrane-associated ring finger (C3HC4) 4, E3 ubiquitin protein ligase | 57574     | 4,05 |
| up | RIMS1     | regulating synaptic membrane exocytosis 1                              | 22999     | 4,04 |
| up | PPP1R14A  | protein phosphatase 1, regulatory (inhibitor) subunit 14A              | 94274     | 4,02 |
| up | RDH10     | retinol dehydrogenase 10 (all-trans)                                   | 157506    | 4,02 |
| up | FNDC1     | fibronectin type III domain containing 1                               | 84624     | 4,00 |
| up | TNFSF4    | tumor necrosis factor (ligand) superfamily, member 4                   | 7292      | 3,94 |
| up | PDE11A    | phosphodiesterase 11A                                                  | 50940     | 3,91 |
| up | VEGFA     | vascular endothelial growth factor A                                   | 7422      | 3,82 |
| up | MYH11     | myosin, heavy chain 11, smooth muscle                                  | 4629      | 3,82 |
| up | LINC00312 | long intergenic non-protein coding RNA 312                             | 29931     | 3,74 |
| up | GYS1      | glycogen synthase 1 (muscle)                                           | 2997      | 3,72 |
| up | CDH8      | cadherin 8, type 2                                                     | 1006      | 3,68 |
| up | CHAC1     | ChaC, cation transport regulator homolog 1 (E, coli)                   | 79094     | 3,61 |
| up | HUNK      | hormonally up-regulated Neu-associated kinase                          | 30811     | 3,60 |
| up | MIR614    | microRNA 614                                                           | 693199    | 3,60 |
| up | SOX9      | SRY (sex determining region Y)-box 9                                   | 6662      | 3,57 |
| up | WNT5A     | wingless-type MMTV integration site family, member 5A                  | 7474      | 3,53 |
| up | PLOD2     | procollagen-lysine, 2-oxoglutarate 5-dioxygenase 2                     | 5352      | 3,53 |
| up | LEP       | leptin                                                                 | 3952      | 3,53 |
| up | NUAK1     | NUAK family, SNF1-like kinase, 1                                       | 9891      | 3,50 |
| up | RGCC      | regulator of cell cycle                                                | 28984     | 3,48 |
| up | HSPB7     | heat shock 27kDa protein family, member 7 (cardiovascular)             | 27129     | 3,42 |
| up | CD24      | CD24 molecule                                                          | 100133941 | 3,41 |
| up | PDCD1LG2  | programmed cell death 1 ligand 2                                       | 80380     | 3,39 |
| up | PGK1      | phosphoglycerate kinase 1                                              | 5230      | 3,39 |
| up | SLC16A3   | solute carrier family 16 (monocarboxylate transporter), member 3       | 9123      | 3,38 |
| up | KCNE4     | potassium voltage-gated channel, Isk-related family, member 4          | 23704     | 3,37 |
| up | LOXL2     | lysyl oxidase-like 2                                                   | 4017      | 3,35 |
| up | SORBS2    | sorbin and SH3 domain containing 2                                     | 8470      | 3,35 |
| up | PLN       | phospholamban                                                          | 5350      | 3,35 |
| up | IL20RB    | interleukin 20 receptor beta                                           | 53833     | 3,30 |
| up | SCN9A     | sodium channel, voltage-gated, type IX, alpha subunit                  | 6335      | 3,30 |
| up | TSPAN18   | tetraspanin 18                                                         | 90139     | 3,29 |
| up | CLIC3     | chloride intracellular channel 3                                       | 9022      | 3,24 |
| up | ITGA11    | integrin, alpha 11                                                     | 22801     | 3,24 |
| up | DSP       | desmoplakin                                                            | 1832      | 3,14 |



|    |          |                                                                    |        |      |
|----|----------|--------------------------------------------------------------------|--------|------|
| up | DCLK2    | doublecortin-like kinase 2                                         | 166614 | 3,14 |
| up | WWC2     | WW and C2 domain containing 2                                      | 80014  | 3,13 |
| up | SEMA7A   | semaphorin 7A, GPI membrane anchor (John Milton Hagen blood group) | 8482   | 3,12 |
| up | SNAI1    | snail family zinc finger 1                                         | 6615   | 3,12 |
| up | RASGRP1  | RAS guanyl releasing protein 1 (calcium and DAG-regulated)         | 10125  | 3,11 |
| up | TMEM45A  | transmembrane protein 45A                                          | 55076  | 3,10 |
| up | PDK1     | pyruvate dehydrogenase kinase, isozyme 1                           | 5163   | 3,10 |
| up | PLCB4    | phospholipase C, beta 4                                            | 5332   | 3,08 |
| up | SLC16A4  | solute carrier family 16, member 4                                 | 9122   | 3,08 |
| up | ANGPTL4  | angiopoietin-like 4                                                | 51129  | 3,04 |
| up | EDIL3    | EGF-like repeats and discoidin I-like domains 3                    | 10085  | 3,03 |
| up | PADI2    | peptidyl arginine deiminase, type II                               | 11240  | 3,02 |
| up | FRY      | furry homolog (Drosophila)                                         | 10129  | 3,02 |
| up | PPP1R13L | protein phosphatase 1, regulatory subunit 13 like                  | 10848  | 3,01 |
| up | LPCAT2   | lysophosphatidylcholine acyltransferase 2                          | 54947  | 2,99 |
| up | DACT1    | dishevelled-binding antagonist of beta-catenin 1                   | 51339  | 2,98 |
| up | SORT1    | sortilin 1                                                         | 6272   | 2,98 |
| up | TGM2     | transglutaminase 2                                                 | 7052   | 2,98 |
| up | GRAMD3   | GRAM domain containing 3                                           | 65983  | 2,98 |
| up | IFFO2    | intermediate filament family orphan 2                              | 126917 | 2,96 |
| up | NPAS2    | neuronal PAS domain protein 2                                      | 4862   | 2,96 |
| up | DIAPH3   | diaphanous-related formin 3                                        | 81624  | 2,95 |
| up | ASNS     | asparagine synthetase (glutamine-hydrolyzing)                      | 440    | 2,94 |
| up | MRVI1    | murine retrovirus integration site 1 homolog                       | 10335  | 2,94 |
| up | GLS      | glutaminase                                                        | 2744   | 2,93 |
| up | LMCD1    | LIM and cysteine-rich domains 1                                    | 29995  | 2,92 |
| up | GPRC5A   | G protein-coupled receptor, class C, group 5, member A             | 9052   | 2,92 |
| up | NALCN    | sodium leak channel, non-selective                                 | 259232 | 2,91 |
| up | AVEN     | apoptosis, caspase activation inhibitor                            | 57099  | 2,90 |
| up | GFRA1    | GDNF family receptor alpha 1                                       | 2674   | 2,88 |
| up | LGMN     | legumain                                                           | 5641   | 2,88 |
| up | HSPG2    | heparan sulfate proteoglycan 2                                     | 3339   | 2,85 |
| up | ALDH1B1  | aldehyde dehydrogenase 1 family, member B1                         | 219    | 2,85 |
| up | PSMD3    | proteasome (prosome, macropain) 26S subunit, non-ATPase, 3         | 5709   | 2,80 |
| up | MIR27B   | microRNA 27b                                                       | 407019 | 2,80 |
| up | ZNF699   | zinc finger protein 699                                            | 374879 | 2,79 |
| up | HMCN1    | hemicentin 1                                                       | 83872  | 2,79 |
| up | SFRP4    | secreted frizzled-related protein 4                                | 6424   | 2,78 |
| up | COL4A2   | collagen, type IV, alpha 2                                         | 1284   | 2,77 |
| up | MYLK     | myosin light chain kinase                                          | 4638   | 2,77 |

|    |               |                                                                                               |        |      |
|----|---------------|-----------------------------------------------------------------------------------------------|--------|------|
| up | MFAP5         | microfibrillar associated protein 5                                                           | 8076   | 2,77 |
| up | P4HA1         | prolyl 4-hydroxylase, alpha polypeptide I                                                     | 5033   | 2,75 |
| up | F3            | coagulation factor III (thromboplastin, tissue factor)                                        | 2152   | 2,74 |
| up | CEBPG         | CCAAT/enhancer binding protein (C/EBP), gamma                                                 | 1054   | 2,73 |
| up | RNF144B       | ring finger protein 144B                                                                      | 255488 | 2,72 |
| up | TUFT1         | tuftelin 1                                                                                    | 7286   | 2,71 |
| up | HAPLN1        | hyaluronan and proteoglycan link protein 1                                                    | 1404   | 2,71 |
| up | PDE5A         | phosphodiesterase 5A, cGMP-specific                                                           | 8654   | 2,69 |
| up | OCLM          | oculomedin                                                                                    | 10896  | 2,69 |
| up | SORBS1        | sorbin and SH3 domain containing 1                                                            | 10580  | 2,69 |
| up | AMIGO2        | adhesion molecule with Ig-like domain 2                                                       | 347902 | 2,68 |
| up | RP11-469A15,2 | novel transcript                                                                              | ---    | 2,67 |
| up | BOK           | BCL2-related ovarian killer                                                                   | 666    | 2,66 |
| up | BMP6          | bone morphogenetic protein 6                                                                  | 654    | 2,65 |
| up | PRPS1         | phosphoribosyl pyrophosphate synthetase 1                                                     | 5631   | 2,63 |
| up | IVNS1ABP      | influenza virus NS1A binding protein                                                          | 10625  | 2,62 |
| up | TEAD3         | TEA domain family member 3                                                                    | 7005   | 2,62 |
| up | MICAL2        | microtubule associated monooxygenase, calponin and LIM domain containing 2                    | 9645   | 2,62 |
| up | STC1          | stanniocalcin 1                                                                               | 6781   | 2,62 |
| up | KRTAP1-1      | keratin associated protein 1-1                                                                | 81851  | 2,62 |
| up | MALL          | mal, T-cell differentiation protein-like                                                      | 7851   | 2,62 |
| up | ADIRF         | adipogenesis regulatory factor                                                                | 10974  | 2,61 |
| up | ERRFI1        | ERBB receptor feedback inhibitor 1                                                            | 54206  | 2,61 |
| up | KRT19         | keratin 19                                                                                    | 3880   | 2,61 |
| up | SEL1L3        | sel-1 suppressor of lin-12-like 3 (C, elegans)                                                | 23231  | 2,61 |
| up | PKP4          | plakophilin 4                                                                                 | 8502   | 2,61 |
| up | CPEB2         | cytoplasmic polyadenylation element binding protein 2                                         | 132864 | 2,59 |
| up | TSPAN2        | tetraspanin 2                                                                                 | 10100  | 2,59 |
| up | LMOD1         | leiomodoin 1 (smooth muscle)                                                                  | 25802  | 2,58 |
| up | PDLIM5        | PDZ and LIM domain 5                                                                          | 10611  | 2,58 |
| up | ADAMTS12      | ADAM metallopeptidase with thrombospondin type 1 motif, 12                                    | 81792  | 2,55 |
| up | BAIAP2L1      | BAI1-associated protein 2-like 1                                                              | 55971  | 2,55 |
| up | SERPINE1      | serpin peptidase inhibitor, clade E (nexin, plasminogen activator inhibitor type 1), member 1 | 5054   | 2,55 |
| up | NEK7          | NIMA-related kinase 7                                                                         | 140609 | 2,55 |
| up | WNT2          | wingless-type MMTV integration site family member 2                                           | 7472   | 2,54 |
| up | MYH2          | myosin, heavy chain 2, skeletal muscle, adult                                                 | 4620   | 2,54 |
| up | TGFBR1        | transforming growth factor, beta receptor 1                                                   | 7046   | 2,54 |
| up | MFGE8         | milk fat globule-EGF factor 8 protein                                                         | 4240   | 2,53 |

|    |         |                                                                                                      |        |      |
|----|---------|------------------------------------------------------------------------------------------------------|--------|------|
| up | MTHFD2  | methylenetetrahydrofolate dehydrogenase (NADP+ dependent) 2, methenyltetrahydrofolate cyclohydrolase | 10797  | 2,51 |
| up | COL8A1  | collagen, type VIII, alpha 1                                                                         | 1295   | 2,51 |
| up | PTGIS   | prostaglandin I2 (prostacyclin) synthase                                                             | 5740   | 2,51 |
| up | GPR155  | G protein-coupled receptor 155                                                                       | 151556 | 2,50 |
| up | ITGA1   | integrin, alpha 1                                                                                    | 3672   | 2,50 |
| up | FLNB    | filamin B, beta                                                                                      | 2317   | 2,50 |
| up | HAS2    | hyaluronan synthase 2                                                                                | 3037   | 2,50 |
| up | RASSF2  | Ras association (RalGDS/AF-6) domain family member 2                                                 | 9770   | 2,49 |
| up | ADAMTS6 | ADAM metallopeptidase with thrombospondin type 1 motif, 6                                            | 11174  | 2,48 |
| up | C5orf28 | chromosome 5 open reading frame 28                                                                   | 64417  | 2,47 |
| up | RNF187  | ring finger protein 187                                                                              | 149603 | 2,44 |
| up | PLOD1   | procollagen-lysine, 2-oxoglutarate 5-dioxygenase 1                                                   | 5351   | 2,44 |
| up | TRAM1   | translocation associated membrane protein 1                                                          | 23471  | 2,44 |
| up | SSC5D   | scavenger receptor cysteine rich domain containing (5 domains)                                       | 284297 | 2,43 |
| up | CORO2B  | coronin, actin binding protein, 2B                                                                   | 10391  | 2,42 |
| up | CXorf56 | chromosome X open reading frame 56                                                                   | 63932  | 2,42 |
| up | JPH2    | junctophilin 2                                                                                       | 57158  | 2,42 |
| up | KCNK6   | potassium channel, subfamily K, member 6                                                             | 9424   | 2,42 |
| up | SASS6   | spindle assembly 6 homolog (C, elegans)                                                              | 163786 | 2,42 |
| up | MCAM    | melanoma cell adhesion molecule                                                                      | 4162   | 2,41 |
| up | NFASC   | neurofascin                                                                                          | 23114  | 2,41 |
| up | SDC2    | syndecan 2                                                                                           | 6383   | 2,40 |
| up | ABCC3   | ATP-binding cassette, sub-family C (CFTR/MRP), member 3                                              | 8714   | 2,40 |
| up | WISP1   | WNT1 inducible signaling pathway protein 1                                                           | 8840   | 2,40 |
| up | FLNC    | filamin C, gamma                                                                                     | 2318   | 2,39 |
| up | NGF     | nerve growth factor (beta polypeptide)                                                               | 4803   | 2,39 |
| up | TMEM130 | transmembrane protein 130                                                                            | 222865 | 2,39 |
| up | VASP    | vasodilator-stimulated phosphoprotein                                                                | 7408   | 2,39 |
| up | JAM2    | junctional adhesion molecule 2                                                                       | 58494  | 2,38 |
| up | WIPF3   | WAS/WASL interacting protein family, member 3                                                        | 644150 | 2,38 |
| up | RASA4   | RAS p21 protein activator 4                                                                          | 10156  | 2,38 |
| up | FAM101B | family with sequence similarity 101, member B                                                        | 359845 | 2,38 |
| up | ALDH1L2 | aldehyde dehydrogenase 1 family, member L2                                                           | 160428 | 2,38 |
| up | POLR2J  | polymerase (RNA) II (DNA directed) polypeptide J, 13,3kDa                                            | 5439   | 2,36 |
| up | FOXP1   | forkhead box G1                                                                                      | 2290   | 2,35 |
| up | ATP10A  | ATPase, class V, type 10A                                                                            | 57194  | 2,35 |
| up | MYH10   | myosin, heavy chain 10, non-muscle                                                                   | 4628   | 2,35 |
| up | PFKP    | phosphofructokinase, platelet                                                                        | 5214   | 2,34 |

|    |           |                                                                              |           |      |
|----|-----------|------------------------------------------------------------------------------|-----------|------|
| up | ERCC6     | excision repair cross-complementation group 6                                | 2074      | 2,33 |
| up | SYTL2     | synaptotagmin-like 2                                                         | 54843     | 2,33 |
| up | CEP112    | centrosomal protein 112kDa                                                   | 201134    | 2,33 |
| up | FHOD3     | formin homology 2 domain containing 3                                        | 80206     | 2,32 |
| up | INHBB     | inhibin, beta B                                                              | 3625      | 2,32 |
| up | ARSJ      | arylsulfatase family, member J                                               | 79642     | 2,31 |
| up | PMM2      | phosphomannomutase 2                                                         | 5373      | 2,31 |
| up | RAPH1     | Ras association (RalGDS/AF-6) and pleckstrin homology domains 1              | 65059     | 2,30 |
| up | PACSIN3   | protein kinase C and casein kinase substrate in neurons 3                    | 29763     | 2,30 |
| up | HSPA2     | heat shock 70kDa protein 2                                                   | 3306      | 2,29 |
| up | CDKL5     | cyclin-dependent kinase-like 5                                               | 6792      | 2,29 |
| up | SLC4A4    | solute carrier family 4 (sodium bicarbonate cotransporter), member 4         | 8671      | 2,29 |
| up | PLCB1     | phospholipase C, beta 1 (phosphoinositide-specific)                          | 23236     | 2,28 |
| up | UNC5B     | unc-5 homolog B (C, elegans)                                                 | 219699    | 2,27 |
| up | SLC1A4    | solute carrier family 1 (glutamate/neutral amino acid transporter), member 4 | 6509      | 2,27 |
| up | ECM2      | extracellular matrix protein 2, female organ and adipocyte specific          | 1842      | 2,26 |
| up | FAM66C    | family with sequence similarity 66, member C                                 | 440078    | 2,25 |
| up | PPME1     | protein phosphatase methylesterase 1                                         | 51400     | 2,25 |
| up | ITGBL1    | integrin, beta-like 1 (with EGF-like repeat domains)                         | 9358      | 2,25 |
| up | PDLIM7    | PDZ and LIM domain 7 (enigma)                                                | 9260      | 2,24 |
| up | RUSC2     | RUN and SH3 domain containing 2                                              | 9853      | 2,24 |
| up | WARS      | tryptophanyl-tRNA synthetase                                                 | 7453      | 2,24 |
| up | CD55      | CD55 molecule, decay accelerating factor for complement (Cromer blood group) | 1604      | 2,24 |
| up | CTGF      | connective tissue growth factor                                              | 1490      | 2,23 |
| up | PVR       | poliovirus receptor                                                          | 5817      | 2,23 |
| up | YEATS2    | YEATS domain containing 2                                                    | 55689     | 2,23 |
| up | LINC01023 | long intergenic non-protein coding RNA 1023                                  | 100652853 | 2,21 |
| up | RGS19     | regulator of G-protein signaling 19                                          | 10287     | 2,20 |
| up | TRIB3     | tribbles pseudokinase 3                                                      | 57761     | 2,20 |
| up | MUC1      | mucin 1, cell surface associated                                             | 4582      | 2,20 |
| up | MEGF6     | multiple EGF-like-domains 6                                                  | 1953      | 2,20 |
| up | A2M       | alpha-2-macroglobulin                                                        | 2         | 2,18 |
| up | TSPAN13   | tetraspanin 13                                                               | 27075     | 2,18 |
| up | FAT1      | FAT atypical cadherin 1                                                      | 2195      | 2,17 |
| up | PCK2      | phosphoenolpyruvate carboxykinase 2 (mitochondrial)                          | 5106      | 2,17 |
| up | IDH2      | isocitrate dehydrogenase 2 (NADP+), mitochondrial                            | 3418      | 2,16 |
| up | SDPR      | serum deprivation response                                                   | 8436      | 2,16 |
| up | PTPRB     | protein tyrosine phosphatase, receptor type, B                               | 5787      | 2,15 |

|    |              |                                                                                             |           |      |
|----|--------------|---------------------------------------------------------------------------------------------|-----------|------|
| up | JAG1         | jagged 1                                                                                    | 182       | 2,15 |
| up | COL5A1       | collagen, type V, alpha 1                                                                   | 1289      | 2,15 |
| up | COMP         | cartilage oligomeric matrix protein                                                         | 1311      | 2,14 |
| up | ACTR1B       | ARP1 actin-related protein 1 homolog B, centractin beta (yeast)                             | 10120     | 2,14 |
| up | AFF3         | AF4/FMR2 family, member 3                                                                   | 3899      | 2,14 |
| up | NEXN         | nexilin (F actin binding protein)                                                           | 91624     | 2,14 |
| up | VCAN         | versican                                                                                    | 1462      | 2,14 |
| up | NPR3         | natriuretic peptide receptor 3                                                              | 4883      | 2,13 |
| up | RP11-23E10,2 | novel transcript                                                                            | ---       | 2,13 |
| up | INIP         | INTS3 and NABP interacting protein                                                          | 58493     | 2,12 |
| up | INA          | internexin neuronal intermediate filament protein, alpha                                    | 9118      | 2,12 |
| up | USP53        | ubiquitin specific peptidase 53                                                             | 54532     | 2,12 |
| up | MIR4640      | microRNA 4640                                                                               | 100616237 | 2,12 |
| up | GCLM         | glutamate-cysteine ligase, modifier subunit                                                 | 2730      | 2,11 |
| up | GOLGA8A      | golgin A8 family, member A                                                                  | 23015     | 2,11 |
| up | C7orf60      | chromosome 7 open reading frame 60                                                          | 154743    | 2,11 |
| up | FAM219A      | family with sequence similarity 219, member A                                               | 203259    | 2,10 |
| up | KIAA1462     | KIAA1462                                                                                    | 57608     | 2,10 |
| up | SGPL1        | sphingosine-1-phosphate lyase 1                                                             | 8879      | 2,10 |
| up | NEDD1        | neural precursor cell expressed, developmentally down-regulated 1                           | 121441    | 2,10 |
| up | COL5A2       | collagen, type V, alpha 2                                                                   | 1290      | 2,10 |
| up | GCNT4        | glucosaminyl (N-acetyl) transferase 4, core 2                                               | 51301     | 2,09 |
| up | DAAM1        | dishevelled associated activator of morphogenesis 1                                         | 23002     | 2,09 |
| up | BAMBI        | BMP and activin membrane-bound inhibitor                                                    | 25805     | 2,09 |
| up | SLC25A4      | solute carrier family 25 (mitochondrial carrier; adenine nucleotide translocator), member 4 | 291       | 2,09 |
| up | SGCD         | sarcoglycan, delta (35kDa dystrophin-associated glycoprotein)                               | 6444      | 2,09 |
| up | SSH1         | slingshot protein phosphatase 1                                                             | 54434     | 2,09 |
| up | C1orf198     | chromosome 1 open reading frame 198                                                         | 84886     | 2,09 |
| up | TGFBR3L      | transforming growth factor, beta receptor III-like                                          | 100507588 | 2,09 |
| up | ARL4D        | ADP-ribosylation factor-like 4D                                                             | 379       | 2,08 |
| up | HIAT1        | hippocampus abundant transcript 1                                                           | 64645     | 2,08 |
| up | EIF4EBP1     | eukaryotic translation initiation factor 4E binding protein 1                               | 1978      | 2,08 |
| up | TPM1         | tropomyosin 1 (alpha)                                                                       | 7168      | 2,08 |
| up | PKD1         | polycystic kidney disease 1 (autosomal dominant)                                            | 5310      | 2,08 |
| up | ENO1         | enolase 1, (alpha)                                                                          | 2023      | 2,08 |
| up | COL8A2       | collagen, type VIII, alpha 2                                                                | 1296      | 2,08 |
| up | DHRS3        | dehydrogenase/reductase (SDR family) member 3                                               | 9249      | 2,07 |
| up | NLN          | neurolysin (metallopeptidase M3 family)                                                     | 57486     | 2,07 |

|      |          |                                                                    |           |       |
|------|----------|--------------------------------------------------------------------|-----------|-------|
| up   | SLC1A5   | solute carrier family 1 (neutral amino acid transporter), member 5 | 6510      | 2,07  |
| up   | CALD1    | caldesmon 1                                                        | 800       | 2,07  |
| up   | OR2T35   | olfactory receptor, family 2, subfamily T, member 35               | 403244    | 2,07  |
| up   | LARGE    | like-glycosyltransferase                                           | 9215      | 2,06  |
| up   | RNF181   | ring finger protein 181                                            | 51255     | 2,06  |
| up   | TRAF5    | TNF receptor-associated factor 5                                   | 7188      | 2,05  |
| up   | C19orf25 | chromosome 19 open reading frame 25                                | 148223    | 2,05  |
| up   | DDAH1    | dimethylarginine dimethylaminohydrolase 1                          | 23576     | 2,05  |
| up   | COL12A1  | collagen, type XII, alpha 1                                        | 1303      | 2,05  |
| up   | SNORD19B | small nucleolar RNA, C/D box 19B                                   | 100113381 | 2,05  |
| up   | LYPD6B   | LY6/PLAUR domain containing 6B                                     | 130576    | 2,04  |
| up   | PCGF5    | polycomb group ring finger 5                                       | 84333     | 2,03  |
| up   | ROR1     | receptor tyrosine kinase-like orphan receptor 1                    | 4919      | 2,03  |
| up   | TECPR2   | tectonin beta-propeller repeat containing 2                        | 9895      | 2,03  |
| up   | JADE1    | jade family PHD finger 1                                           | 79960     | 2,03  |
| up   | ENTPD4   | ectonucleoside triphosphate diphosphohydrolase 4                   | 9583      | 2,02  |
| up   | MEG3     | maternally expressed 3 (non-protein coding)                        | 55384     | 2,02  |
| up   | IMPA2    | inositol(myo)-1(or 4)-monophosphatase 2                            | 3613      | 2,02  |
| up   | RNF217   | ring finger protein 217                                            | 154214    | 2,02  |
| up   | TTLL7    | tubulin tyrosine ligase-like family, member 7                      | 79739     | 2,01  |
| up   | IGFBP5   | insulin-like growth factor binding protein 5                       | 3488      | 2,01  |
| up   | MKNK2    | MAP kinase interacting serine/threonine kinase 2                   | 2872      | 2,01  |
| up   | SLC8A1   | solute carrier family 8 (sodium/calcium exchanger), member 1       | 6546      | 2,01  |
| up   | TUBE1    | tubulin, epsilon 1                                                 | 51175     | 2,01  |
| up   | SLC38A4  | solute carrier family 38, member 4                                 | 55089     | 2,01  |
| up   | RAVER2   | ribonucleoprotein, PTB-binding 2                                   | 55225     | 2,00  |
| down | IFIT3    | interferon-induced protein with tetratricopeptide repeats 3        | 3437      | -2,01 |
| down | PPAP2B   | phosphatidic acid phosphatase type 2B                              | 8613      | -2,01 |
| down | USP17L23 | ubiquitin specific peptidase 17-like family member 23              | ---       | -2,01 |
| down | DHCR24   | 24-dehydrocholesterol reductase                                    | 1718      | -2,02 |
| down | CTAGE1   | cutaneous T-cell lymphoma-associated antigen 1                     | 64693     | -2,03 |
| down | ZNF563   | zinc finger protein 563                                            | 147837    | -2,03 |
| down | IL1R1    | interleukin 1 receptor, type I                                     | 3554      | -2,03 |
| down | EEPD1    | endonuclease/exonuclease/phosphatase family domain containing 1    | 80820     | -2,03 |
| down | PHLDA1   | pleckstrin homology-like domain, family A, member 1                | 22822     | -2,04 |
| down | NAV2     | neuron navigator 2                                                 | 89797     | -2,05 |
| down | MCL1     | myeloid cell leukemia 1                                            | 4170      | -2,05 |
| down | ZFP36    | ZFP36 ring finger protein                                          | 7538      | -2,05 |

|      |           |                                                                                   |        |       |
|------|-----------|-----------------------------------------------------------------------------------|--------|-------|
| down | ALDH3A2   | aldehyde dehydrogenase 3 family, member A2                                        | 224    | -2,06 |
| down | SAT1      | spermidine/spermine N1-acetyltransferase 1                                        | 6303   | -2,06 |
| down | ARMC9     | armadillo repeat containing 9                                                     | 80210  | -2,07 |
| down | CLIC2     | chloride intracellular channel 2                                                  | 1193   | -2,07 |
| down | OR2L3     | olfactory receptor, family 2, subfamily L, member 3                               | 391192 | -2,10 |
| down | MYLIP     | myosin regulatory light chain interacting protein                                 | 29116  | -2,11 |
| down | TMTC1     | transmembrane and tetratricopeptide repeat containing 1                           | 83857  | -2,11 |
| down | SLC1A3    | solute carrier family 1 (glial high affinity glutamate transporter), member 3     | 6507   | -2,11 |
| down | IFI16     | interferon, gamma-inducible protein 16                                            | 3428   | -2,12 |
| down | PTGFR     | prostaglandin F receptor (FP)                                                     | 5737   | -2,12 |
| down | HSPA4L    | heat shock 70kDa protein 4-like                                                   | 22824  | -2,13 |
| down | GLUD1     | glutamate dehydrogenase 1                                                         | 2746   | -2,14 |
| down | IGSF10    | immunoglobulin superfamily, member 10                                             | 285313 | -2,14 |
| down | SLC40A1   | solute carrier family 40 (iron-regulated transporter), member 1                   | 30061  | -2,14 |
| down | KLF6      | Kruppel-like factor 6                                                             | 1316   | -2,14 |
| down | DNM1      | dynamamin 1                                                                       | 1759   | -2,15 |
| down | PROS1     | protein S (alpha)                                                                 | 5627   | -2,15 |
| down | FASN      | fatty acid synthase                                                               | 2194   | -2,16 |
| down | MME       | membrane metallo-endopeptidase                                                    | 4311   | -2,16 |
| down | HCG9      | HLA complex group 9 (non-protein coding)                                          | 10255  | -2,16 |
| down | PTGDS     | prostaglandin D2 synthase 21kDa (brain)                                           | 5730   | -2,16 |
| down | SNORA70   | small nucleolar RNA, H/ACA box 70                                                 | 26778  | -2,18 |
| down | ZCCHC14   | zinc finger, CCHC domain containing 14                                            | 23174  | -2,18 |
| down | LINC01002 | long intergenic non-protein coding RNA 1002                                       | 399844 | -2,18 |
| down | HIST1H2BM | histone cluster 1, H2bm                                                           | 8342   | -2,18 |
| down | IFITM1    | interferon induced transmembrane protein 1                                        | 8519   | -2,21 |
| down | DAB1      | Dab, reelin signal transducer, homolog 1 (Drosophila)                             | 1600   | -2,23 |
| down | SCPEP1    | serine carboxypeptidase 1                                                         | 59342  | -2,23 |
| down | SAMHD1    | SAM domain and HD domain 1                                                        | 25939  | -2,24 |
| down | DCN       | decorin                                                                           | 1634   | -2,25 |
| down | ZNF480    | zinc finger protein 480                                                           | 147657 | -2,26 |
| down | EGFR      | epidermal growth factor receptor                                                  | 1956   | -2,27 |
| down | TGFBR3    | transforming growth factor, beta receptor III                                     | 7049   | -2,31 |
| down | SLC9A9    | solute carrier family 9, subfamily A (NHE9, cation proton antiporter 9), member 9 | 285195 | -2,32 |
| down | ZNF608    | zinc finger protein 608                                                           | 57507  | -2,34 |
| down | TNXB      | tenascin XB                                                                       | 7148   | -2,34 |
| down | UBC       | ubiquitin C                                                                       | 7316   | -2,35 |
| down | KCND2     | potassium voltage-gated channel, Shal-related subfamily, member 2                 | 3751   | -2,37 |
| down | KIF4B     | kinesin family member 4B                                                          | 285643 | -2,37 |

|      |           |                                                                                                        |           |       |
|------|-----------|--------------------------------------------------------------------------------------------------------|-----------|-------|
| down | HIST2H2AB | histone cluster 2, H2ab                                                                                | 317772    | -2,38 |
| down | TBC1D29   | TBC1 domain family, member 29                                                                          | 26083     | -2,40 |
| down | SOX4      | SRY (sex determining region Y)-box 4                                                                   | 6659      | -2,41 |
| down | ARMCX1    | armadillo repeat containing, X-linked 1                                                                | 51309     | -2,42 |
| down | OSR2      | odd-skipped related transcription factor 2                                                             | 116039    | -2,44 |
| down | FADS1     | fatty acid desaturase 1                                                                                | 3992      | -2,44 |
| down | CLU       | clusterin                                                                                              | 1191      | -2,48 |
| down | OR56A5    | olfactory receptor, family 56, subfamily A, member 5                                                   | 390084    | -2,49 |
| down | SOCS3     | suppressor of cytokine signaling 3                                                                     | 9021      | -2,51 |
| down | OR2A14    | olfactory receptor, family 2, subfamily A, member 14                                                   | 135941    | -2,52 |
| down | GH2       | growth hormone 2                                                                                       | 2689      | -2,53 |
| down | CDON      | cell adhesion associated, oncogene regulated                                                           | 50937     | -2,54 |
| down | SRSF7     | serine/arginine-rich splicing factor 7                                                                 | 6432      | -2,55 |
| down | EGR1      | early growth response 1                                                                                | 1958      | -2,60 |
| down | IER2      | immediate early response 2                                                                             | 9592      | -2,60 |
| down | PPARGC1A  | peroxisome proliferator-activated receptor gamma, coactivator 1 alpha                                  | 10891     | -2,60 |
| down | AKAP12    | A kinase (PRKA) anchor protein 12                                                                      | 9590      | -2,65 |
| down | PLXNC1    | plexin C1                                                                                              | 10154     | -2,65 |
| down | PDE7B     | phosphodiesterase 7B                                                                                   | 27115     | -2,67 |
| down | TAF9B     | TAF9B RNA polymerase II, TATA box binding protein (TBP)-associated factor, 31kDa                       | 51616     | -2,74 |
| down | TCEB3C    | transcription elongation factor B polypeptide 3C (elongin A3)                                          | 162699    | -2,74 |
| down | JUNB      | jun B proto-oncogene                                                                                   | 3726      | -2,75 |
| down | SLC43A3   | solute carrier family 43, member 3                                                                     | 29015     | -2,76 |
| down | SCARA3    | scavenger receptor class A, member 3                                                                   | 51435     | -2,77 |
| down | RRP7B     | ribosomal RNA processing 7 homolog B (S, cerevisiae)                                                   | 91695     | -2,77 |
| down | LGALS9B   | lectin, galactoside-binding, soluble, 9B                                                               | 284194    | -2,77 |
| down | TNFSF10   | tumor necrosis factor (ligand) superfamily, member 10                                                  | 8743      | -2,81 |
| down | INSIG1    | insulin induced gene 1                                                                                 | 3638      | -2,84 |
| down | ABCC9     | ATP-binding cassette, sub-family C (CFTR/MRP), member 9                                                | 10060     | -2,85 |
| down | MIR3620   | microRNA 3620                                                                                          | 100500810 | -2,88 |
| down | DBET      | D4Z4 binding element transcript (non-protein coding)                                                   | 100419743 | -2,95 |
| down | NFKBIZ    | nuclear factor of kappa light polypeptide gene enhancer in B-cells inhibitor, zeta                     | 64332     | -2,98 |
| down | JUN       | jun proto-oncogene                                                                                     | 3725      | -3,00 |
| down | SERPINF1  | serpin peptidase inhibitor, clade F (alpha-2 antiplasmin, pigment epithelium derived factor), member 1 | 5176      | -3,04 |
| down | ANGPTL2   | angiopoietin-like 2                                                                                    | 23452     | -3,05 |
| down | PDGFD     | platelet derived growth factor D                                                                       | 80310     | -3,07 |



|      |          |                                                                                       |           |       |
|------|----------|---------------------------------------------------------------------------------------|-----------|-------|
| down | SLC7A8   | solute carrier family 7 (amino acid transporter light chain, L system), member 8      | 23428     | -3,08 |
| down | MAFB     | v-maf avian musculoaponeurotic fibrosarcoma oncogene homolog B                        | 9935      | -3,15 |
| down | APCDD1   | adenomatosis polyposis coli down-regulated 1                                          | 147495    | -3,17 |
| down | CDC25B   | cell division cycle 25B                                                               | 994       | -3,19 |
| down | PTGS2    | prostaglandin-endoperoxide synthase 2 (prostaglandin G/H synthase and cyclooxygenase) | 5743      | -3,23 |
| down | BRINP1   | bone morphogenetic protein/retinoic acid inducible neural-specific 1                  | 1620      | -3,26 |
| down | KLF4     | Kruppel-like factor 4 (gut)                                                           | 9314      | -3,28 |
| down | DUX4L1   | double homeobox 4 like 1                                                              | 22947     | -3,31 |
| down | PDGFRL   | platelet-derived growth factor receptor-like                                          | 5157      | -3,36 |
| down | PCSK7    | proprotein convertase subtilisin/kexin type 7                                         | 9159      | -3,37 |
| down | FLT3LG   | fms-related tyrosine kinase 3 ligand                                                  | 2323      | -3,44 |
| down | LDLR     | low density lipoprotein receptor                                                      | 3949      | -3,50 |
| down | USP17L15 | ubiquitin specific peptidase 17-like family member 15                                 | 100288520 | -3,54 |
| down | LRRC32   | leucine rich repeat containing 32                                                     | 2615      | -3,58 |
| down | GPNMB    | glycoprotein (transmembrane) nmb                                                      | 10457     | -3,60 |
| down | ZNF595   | zinc finger protein 595                                                               | 152687    | -3,60 |
| down | OC90     | otoconin 90                                                                           | 729330    | -3,60 |
| down | RCAN2    | regulator of calcineurin 2                                                            | 10231     | -3,62 |
| down | FOS      | FBJ murine osteosarcoma viral oncogene homolog                                        | 2353      | -3,79 |
| down | COLEC12  | collectin sub-family member 12                                                        | 81035     | -3,81 |
| down | SCD      | stearoyl-CoA desaturase (delta-9-desaturase)                                          | 6319      | -3,84 |
| down | WISP2    | WNT1 inducible signaling pathway protein 2                                            | 8839      | -3,85 |
| down | IL13RA2  | interleukin 13 receptor, alpha 2                                                      | 3598      | -4,01 |
| down | GALNT15  | polypeptide N-acetylgalactosaminyltransferase 15                                      | 117248    | -4,12 |
| down | ADH1B    | alcohol dehydrogenase 1B (class I), beta polypeptide                                  | 125       | -4,27 |
| down | ABCA9    | ATP-binding cassette, sub-family A (ABC1), member 9                                   | 10350     | -4,29 |
| down | APOD     | apolipoprotein D                                                                      | 347       | -4,30 |
| down | DUX4     | double homeobox 4                                                                     | 100288687 | -4,39 |
| down | DPP4     | dipeptidyl-peptidase 4                                                                | 1803      | -4,45 |
| down | MMP3     | matrix metalloproteinase 3 (stromelysin 1, progelatinase)                             | 4314      | -5,07 |
| down | USP17L5  | ubiquitin specific peptidase 17-like family member 5                                  | 728386    | -5,56 |
| down | ABCA6    | ATP-binding cassette, sub-family A (ABC1), member 6                                   | 23460     | -5,60 |
| down | RSPO3    | R-spondin 3                                                                           | 84870     | -6,83 |
| down | CTSK     | cathepsin K                                                                           | 1513      | -7,29 |
| down | MMP1     | matrix metalloproteinase 1 (interstitial collagenase)                                 | 4312      | -7,96 |
| down | FOSB     | FBJ murine osteosarcoma viral oncogene homolog B                                      | 2354      | -8,42 |



Table S3. Complete list of up- and down-regulated genes in C3 cells.

| Direction in C3 cells | Genesymbol | Gene name                                                                        | Entrez Gene ID | Fold change C3 vs C0 |
|-----------------------|------------|----------------------------------------------------------------------------------|----------------|----------------------|
| up                    | KRTAP2-3   | keratin associated protein 2-3                                                   | 730755         | 12,81                |
| up                    | SCUBE3     | signal peptide, CUB domain, EGF-like 3                                           | 222663         | 10,53                |
| up                    | ANKRD1     | ankyrin repeat domain 1 (cardiac muscle)                                         | 27063          | 9,15                 |
| up                    | OXTR       | oxytocin receptor                                                                | 5021           | 6,97                 |
| up                    | EDN1       | endothelin 1                                                                     | 1906           | 5,99                 |
| up                    | SRGN       | serglycin                                                                        | 5552           | 5,93                 |
| up                    | KRTAP1-5   | keratin associated protein 1-5                                                   | 83895          | 5,92                 |
| up                    | ANLN       | anillin, actin binding protein                                                   | 54443          | 5,85                 |
| up                    | FBN2       | fibrillin 2                                                                      | 2201           | 5,27                 |
| up                    | PRR11      | proline rich 11                                                                  | 55771          | 5,18                 |
| up                    | KIF20A     | kinesin family member 20A                                                        | 10112          | 5,06                 |
| up                    | MYPN       | myopalladin                                                                      | 84665          | 4,87                 |
| up                    | ADIRF      | adipogenesis regulatory factor                                                   | 10974          | 4,79                 |
| up                    | ARSJ       | arylsulfatase family, member J                                                   | 79642          | 4,67                 |
| up                    | HAPLN3     | hyaluronan and proteoglycan link protein 3                                       | 145864         | 4,58                 |
| up                    | NGF        | nerve growth factor (beta polypeptide)                                           | 4803           | 4,47                 |
| up                    | BUB1       | BUB1 mitotic checkpoint serine/threonine kinase                                  | 699            | 4,42                 |
| up                    | TPX2       | TPX2, microtubule-associated                                                     | 22974          | 4,40                 |
| up                    | MKI67      | marker of proliferation Ki-67                                                    | 4288           | 4,37                 |
| up                    | CEP55      | centrosomal protein 55kDa                                                        | 55165          | 4,36                 |
| up                    | KRT19      | keratin 19                                                                       | 3880           | 4,24                 |
| up                    | TM4SF1     | transmembrane 4 L six family member 1                                            | 4071           | 4,20                 |
| up                    | DCLK2      | doublecortin-like kinase 2                                                       | 166614         | 4,12                 |
| up                    | MARCH4     | membrane-associated ring finger (C3HC4) 4, E3 ubiquitin protein ligase           | 57574          | 4,08                 |
| up                    | NOTCH3     | notch 3                                                                          | 4854           | 4,05                 |
| up                    | COL4A1     | collagen, type IV, alpha 1                                                       | 1282           | 3,90                 |
| up                    | ELN        | elastin                                                                          | 2006           | 3,82                 |
| up                    | DIAPH3     | diaphanous-related formin 3                                                      | 81624          | 3,77                 |
| up                    | SPAG5      | sperm associated antigen 5                                                       | 10615          | 3,72                 |
| up                    | SLC16A4    | solute carrier family 16, member 4                                               | 9122           | 3,63                 |
| up                    | DLGAP5     | discs, large (Drosophila) homolog-associated protein 5                           | 9787           | 3,62                 |
| up                    | CCNA2      | cyclin A2                                                                        | 890            | 3,59                 |
| up                    | PLK1       | polo-like kinase 1                                                               | 5347           | 3,57                 |
| up                    | MALL       | mal, T-cell differentiation protein-like                                         | 7851           | 3,56                 |
| up                    | ITGA8      | integrin, alpha 8                                                                | 8516           | 3,55                 |
| up                    | SHCBP1     | SHC SH2-domain binding protein 1                                                 | 79801          | 3,55                 |
| up                    | SLC7A5     | solute carrier family 7 (amino acid transporter light chain, L system), member 5 | 8140           | 3,51                 |

|    |           |                                                                      |           |      |
|----|-----------|----------------------------------------------------------------------|-----------|------|
| up | SNAI1     | snail family zinc finger 1                                           | 6615      | 3,36 |
| up | PRC1      | protein regulator of cytokinesis 1                                   | 9055      | 3,28 |
| up | ASPM      | asp (abnormal spindle) homolog, microcephaly associated (Drosophila) | 259266    | 3,20 |
| up | CDC20     | cell division cycle 20                                               | 991       | 3,19 |
| up | LINC00152 | long intergenic non-protein coding RNA 152                           | 112597    | 3,16 |
| up | TOP2A     | topoisomerase (DNA) II alpha 170kDa                                  | 7153      | 3,12 |
| up | DSP       | desmoplakin                                                          | 1832      | 3,11 |
| up | KIF11     | kinesin family member 11                                             | 3832      | 3,11 |
| up | PDCD1LG2  | programmed cell death 1 ligand 2                                     | 80380     | 3,10 |
| up | CENPE     | centromere protein E, 312kDa                                         | 1062      | 3,09 |
| up | C19orf25  | chromosome 19 open reading frame 25                                  | 148223    | 3,06 |
| up | SLC16A3   | solute carrier family 16 (monocarboxylate transporter), member 3     | 9123      | 3,05 |
| up | IFFO2     | intermediate filament family orphan 2                                | 126917    | 3,04 |
| up | FOXC2     | forkhead box C2 (MFH-1, mesenchyme forkhead 1)                       | 2303      | 3,03 |
| up | KIF14     | kinesin family member 14                                             | 9928      | 2,98 |
| up | NCAPG     | non-SMC condensin I complex, subunit G                               | 64151     | 2,94 |
| up | ADAMTS6   | ADAM metallopeptidase with thrombospondin type 1 motif, 6            | 11174     | 2,92 |
| up | SEMA7A    | semaphorin 7A, GPI membrane anchor (John Milton Hagen blood group)   | 8482      | 2,90 |
| up | LOXL2     | lysyl oxidase-like 2                                                 | 4017      | 2,89 |
| up | CDH2      | cadherin 2, type 1, N-cadherin (neuronal)                            | 1000      | 2,87 |
| up | DLX2      | distal-less homeobox 2                                               | 1746      | 2,87 |
| up | DKK1      | dickkopf WNT signaling pathway inhibitor 1                           | 22943     | 2,83 |
| up | SPOCD1    | SPOC domain containing 1                                             | 90853     | 2,83 |
| up | BIRC5     | baculoviral IAP repeat containing 5                                  | 332       | 2,83 |
| up | NETO2     | neuropilin (NRP) and tolloid (TLL)-like 2                            | 81831     | 2,79 |
| up | BNIP3     | BCL2/adenovirus E1B 19kDa interacting protein 3                      | 664       | 2,78 |
| up | HSPB7     | heat shock 27kDa protein family, member 7 (cardiovascular)           | 27129     | 2,76 |
| up | MSTN      | myostatin                                                            | 2660      | 2,76 |
| up | CDA       | cytidine deaminase                                                   | 978       | 2,76 |
| up | ZNF185    | zinc finger protein 185 (LIM domain)                                 | 7739      | 2,74 |
| up | TK1       | thymidine kinase 1, soluble                                          | 7083      | 2,74 |
| up | FAM101B   | family with sequence similarity 101, member B                        | 359845    | 2,74 |
| up | ARHGAP11A | Rho GTPase activating protein 11A                                    | 9824      | 2,72 |
| up | OCLM      | oculomedin                                                           | 10896     | 2,71 |
| up | PFKP      | phosphofructokinase, platelet                                        | 5214      | 2,70 |
| up | B3GALT2   | UDP-Gal:betaGlcNAc beta 1,3-galactosyltransferase, polypeptide 2     | 8707      | 2,69 |
| up | CD24      | CD24 molecule                                                        | 100133941 | 2,69 |
| up | TSPAN18   | tetraspanin 18                                                       | 90139     | 2,68 |

|    |           |                                                                                |        |      |
|----|-----------|--------------------------------------------------------------------------------|--------|------|
| up | CHRM2     | cholinergic receptor, muscarinic 2                                             | 1129   | 2,67 |
| up | CASC5     | cancer susceptibility candidate 5                                              | 57082  | 2,67 |
| up | SPDL1     | spindle apparatus coiled-coil protein 1                                        | 54908  | 2,65 |
| up | NUSAP1    | nucleolar and spindle associated protein 1                                     | 51203  | 2,64 |
| up | CNN1      | calponin 1, basic, smooth muscle                                               | 1264   | 2,64 |
| up | BLID      | BH3-like motif containing, cell death inducer                                  | 414899 | 2,63 |
| up | CXorf56   | chromosome X open reading frame 56                                             | 63932  | 2,62 |
| up | ADAM23    | ADAM metallopeptidase domain 23                                                | 8745   | 2,62 |
| up | CDH8      | cadherin 8, type 2                                                             | 1006   | 2,61 |
| up | TNFRSF12A | tumor necrosis factor receptor superfamily, member 12A                         | 51330  | 2,60 |
| up | PEG10     | paternally expressed 10                                                        | 23089  | 2,58 |
| up | KIAA1524  | KIAA1524                                                                       | 57650  | 2,55 |
| up | LMO7DN    | LMO7 downstream neighbor                                                       | 729420 | 2,53 |
| up | SCFD2     | sec1 family domain containing 2                                                | 152579 | 2,51 |
| up | ANKRD54   | ankyrin repeat domain 54                                                       | 129138 | 2,51 |
| up | SLC8A1    | solute carrier family 8 (sodium/calcium exchanger), member 1                   | 6546   | 2,50 |
| up | SMS       | spermine synthase                                                              | 6611   | 2,49 |
| up | ARNTL2    | aryl hydrocarbon receptor nuclear translocator-like 2                          | 56938  | 2,48 |
| up | WWC2      | WW and C2 domain containing 2                                                  | 80014  | 2,47 |
| up | SLC17A9   | solute carrier family 17 (vesicular nucleotide transporter), member 9          | 63910  | 2,47 |
| up | LYPD6B    | LY6/PLAUR domain containing 6B                                                 | 130576 | 2,46 |
| up | PRPS1     | phosphoribosyl pyrophosphate synthetase 1                                      | 5631   | 2,45 |
| up | TGFBI     | transforming growth factor, beta-induced, 68kDa                                | 7045   | 2,44 |
| up | GYS1      | glycogen synthase 1 (muscle)                                                   | 2997   | 2,43 |
| up | SSC5D     | scavenger receptor cysteine rich domain containing (5 domains)                 | 284297 | 2,43 |
| up | FOXL1     | forkhead box L1                                                                | 2300   | 2,43 |
| up | FOXM1     | forkhead box M1                                                                | 2305   | 2,43 |
| up | MIR197    | microRNA 197                                                                   | 406974 | 2,42 |
| up | RASA4     | RAS p21 protein activator 4                                                    | 10156  | 2,41 |
| up | BHLHE40   | basic helix-loop-helix family, member e40                                      | 8553   | 2,41 |
| up | LGMN      | legumain                                                                       | 5641   | 2,40 |
| up | SLC7A1    | solute carrier family 7 (cationic amino acid transporter, y+ system), member 1 | 6541   | 2,40 |
| up | FANCD2    | Fanconi anemia, complementation group D2                                       | 2177   | 2,39 |
| up | LPXN      | leupaxin                                                                       | 9404   | 2,37 |
| up | KIF18A    | kinesin family member 18A                                                      | 81930  | 2,37 |
| up | IQGAP3    | IQ motif containing GTPase activating protein 3                                | 128239 | 2,37 |
| up | COTL1     | coactosin-like F-actin binding protein 1                                       | 23406  | 2,36 |
| up | TSPAN13   | tetraspanin 13                                                                 | 27075  | 2,35 |
| up | SERTAD2   | SERTA domain containing 2                                                      | 9792   | 2,35 |

|    |           |                                                                                               |        |      |
|----|-----------|-----------------------------------------------------------------------------------------------|--------|------|
| up | GATA6     | GATA binding protein 6                                                                        | 2627   | 2,34 |
| up | NLN       | neurolysin (metallopeptidase M3 family)                                                       | 57486  | 2,34 |
| up | CDK1      | cyclin-dependent kinase 1                                                                     | 983    | 2,33 |
| up | SND1-IT1  | SND1 intronic transcript 1 (non-protein coding)                                               | 27099  | 2,33 |
| up | UCHL1     | ubiquitin carboxyl-terminal esterase L1 (ubiquitin thiolesterase)                             | 7345   | 2,33 |
| up | PDE1C     | phosphodiesterase 1C, calmodulin-dependent 70kDa                                              | 5137   | 2,33 |
| up | TES       | testis derived transcript (3 LIM domains)                                                     | 26136  | 2,33 |
| up | LGR5      | leucine-rich repeat containing G protein-coupled receptor 5                                   | 8549   | 2,32 |
| up | KCNE4     | potassium voltage-gated channel, Isk-related family, member 4                                 | 23704  | 2,32 |
| up | GLIPR1    | GLI pathogenesis-related 1                                                                    | 11010  | 2,31 |
| up | CGB8      | chorionic gonadotropin, beta polypeptide 8                                                    | 94115  | 2,31 |
| up | HERC4     | HECT and RLD domain containing E3 ubiquitin protein ligase 4                                  | 26091  | 2,31 |
| up | GFRA1     | GDNF family receptor alpha 1                                                                  | 2674   | 2,31 |
| up | PDLIM5    | PDZ and LIM domain 5                                                                          | 10611  | 2,30 |
| up | TRAJ46    | T cell receptor alpha joining 46                                                              | ---    | 2,29 |
| up | PRUNE2    | prune homolog 2 (Drosophila)                                                                  | 158471 | 2,29 |
| up | ITGA3     | integrin, alpha 3 (antigen CD49C, alpha 3 subunit of VLA-3 receptor)                          | 3675   | 2,28 |
| up | ENTPD4    | ectonucleoside triphosphate diphosphohydrolase 4                                              | 9583   | 2,28 |
| up | LMNB1     | lamin B1                                                                                      | 4001   | 2,27 |
| up | EIF4EBP1  | eukaryotic translation initiation factor 4E binding protein 1                                 | 1978   | 2,26 |
| up | TRIB1     | tribbles pseudokinase 1                                                                       | 10221  | 2,26 |
| up | ITGA6     | integrin, alpha 6                                                                             | 3655   | 2,25 |
| up | DEPDC1    | DEP domain containing 1                                                                       | 55635  | 2,24 |
| up | PSMD3     | proteasome (prosome, macropain) 26S subunit, non-ATPase, 3                                    | 5709   | 2,23 |
| up | SERPINE1  | serpin peptidase inhibitor, clade E (nexin, plasminogen activator inhibitor type 1), member 1 | 5054   | 2,23 |
| up | FLJ21369  | uncharacterized protein FLJ21369                                                              | 79860  | 2,23 |
| up | LINC00862 | long intergenic non-protein coding RNA 862                                                    | 554279 | 2,22 |
| up | PLOD2     | procollagen-lysine, 2-oxoglutarate 5-dioxygenase 2                                            | 5352   | 2,22 |
| up | PDE5A     | phosphodiesterase 5A, cGMP-specific                                                           | 8654   | 2,22 |
| up | MMP3      | matrix metallopeptidase 3 (stromelysin 1, progelatinase)                                      | 4314   | 2,22 |
| up | CLIC3     | chloride intracellular channel 3                                                              | 9022   | 2,21 |
| up | P4HA1     | prolyl 4-hydroxylase, alpha polypeptide I                                                     | 5033   | 2,20 |
| up | PDLIM7    | PDZ and LIM domain 7 (enigma)                                                                 | 9260   | 2,20 |
| up | ACTN1     | actinin, alpha 1                                                                              | 87     | 2,20 |
| up | PLEKHA2   | pleckstrin homology domain containing, family A (phosphoinositide binding specific) member 2  | 59339  | 2,20 |

|    |               |                                                                              |        |      |
|----|---------------|------------------------------------------------------------------------------|--------|------|
| up | PSAT1         | phosphoserine aminotransferase 1                                             | 29968  | 2,20 |
| up | ARL4D         | ADP-ribosylation factor-like 4D                                              | 379    | 2,19 |
| up | HSPB3         | heat shock 27kDa protein 3                                                   | 8988   | 2,19 |
| up | PEAR1         | platelet endothelial aggregation receptor 1                                  | 375033 | 2,19 |
| up | SOX9          | SRY (sex determining region Y)-box 9                                         | 6662   | 2,19 |
| up | PDK1          | pyruvate dehydrogenase kinase, isozyme 1                                     | 5163   | 2,19 |
| up | HBEGF         | heparin-binding EGF-like growth factor                                       | 1839   | 2,19 |
| up | FMN2          | formin 2                                                                     | 56776  | 2,19 |
| up | TPM1          | tropomyosin 1 (alpha)                                                        | 7168   | 2,18 |
| up | KCTD20        | potassium channel tetramerization domain containing 20                       | 222658 | 2,17 |
| up | TMSB10        | thymosin beta 10                                                             | 9168   | 2,17 |
| up | SH2D4A        | SH2 domain containing 4A                                                     | 63898  | 2,17 |
| up | CRLF1         | cytokine receptor-like factor 1                                              | 9244   | 2,17 |
| up | GPRC5A        | G protein-coupled receptor, class C, group 5, member A                       | 9052   | 2,17 |
| up | FLNC          | filamin C, gamma                                                             | 2318   | 2,16 |
| up | KIAA0101      | KIAA0101                                                                     | 9768   | 2,16 |
| up | ASPN          | asporin                                                                      | 54829  | 2,16 |
| up | SLC2A1        | solute carrier family 2 (facilitated glucose transporter), member 1          | 6513   | 2,16 |
| up | MIR614        | microRNA 614                                                                 | 693199 | 2,15 |
| up | DCBLD1        | discoidin, CUB and LCCL domain containing 1                                  | 285761 | 2,15 |
| up | HSPG2         | heparan sulfate proteoglycan 2                                               | 3339   | 2,14 |
| up | CSRP1         | cysteine and glycine-rich protein 1                                          | 1465   | 2,14 |
| up | AVEN          | apoptosis, caspase activation inhibitor                                      | 57099  | 2,14 |
| up | VEGFC         | vascular endothelial growth factor C                                         | 7424   | 2,14 |
| up | SORT1         | sortilin 1                                                                   | 6272   | 2,14 |
| up | CKAP2         | cytoskeleton associated protein 2                                            | 26586  | 2,13 |
| up | SMYD2         | SET and MYND domain containing 2                                             | 56950  | 2,13 |
| up | GSTA1         | glutathione S-transferase alpha 1                                            | 2938   | 2,13 |
| up | KCNK6         | potassium channel, subfamily K, member 6                                     | 9424   | 2,13 |
| up | VAT1L         | vesicle amine transport 1-like                                               | 57687  | 2,13 |
| up | TAF1D         | TATA box binding protein (TBP)-associated factor, RNA polymerase I, D, 41kDa | 79101  | 2,12 |
| up | RP11-469A15,2 | novel transcript                                                             | ---    | 2,12 |
| up | FGF5          | fibroblast growth factor 5                                                   | 2250   | 2,12 |
| up | HAPLN1        | hyaluronan and proteoglycan link protein 1                                   | 1404   | 2,11 |
| up | FLG           | filaggrin                                                                    | 2312   | 2,11 |
| up | FKBP11        | FK506 binding protein 11, 19 kDa                                             | 51303  | 2,11 |
| up | GGT2          | gamma-glutamyltransferase 2                                                  | 728441 | 2,11 |
| up | CORO1C        | coronin, actin binding protein, 1C                                           | 23603  | 2,11 |
| up | AKAP6         | A kinase (PRKA) anchor protein 6                                             | 9472   | 2,10 |

|      |               |                                                                              |           |       |
|------|---------------|------------------------------------------------------------------------------|-----------|-------|
| up   | F3            | coagulation factor III (thromboplastin, tissue factor)                       | 2152      | 2,08  |
| up   | PRRX2         | paired related homeobox 2                                                    | 51450     | 2,07  |
| up   | SEL1L3        | sel-1 suppressor of lin-12-like 3 (C, elegans)                               | 23231     | 2,07  |
| up   | MICAL2        | microtubule associated monooxygenase, calponin and LIM domain containing 2   | 9645      | 2,07  |
| up   | PLCB1         | phospholipase C, beta 1 (phosphoinositide-specific)                          | 23236     | 2,06  |
| up   | NPAS2         | neuronal PAS domain protein 2                                                | 4862      | 2,05  |
| up   | LY6K          | lymphocyte antigen 6 complex, locus K                                        | 54742     | 2,05  |
| up   | CCNB1         | cyclin B1                                                                    | 891       | 2,05  |
| up   | C12orf75      | chromosome 12 open reading frame 75                                          | 387882    | 2,05  |
| up   | MYBL1         | v-myb avian myeloblastosis viral oncogene homolog-like 1                     | 4603      | 2,05  |
| up   | XYLT1         | xylosyltransferase I                                                         | 64131     | 2,04  |
| up   | ABCC3         | ATP-binding cassette, sub-family C (CFTR/MRP), member 3                      | 8714      | 2,04  |
| up   | CKAP2L        | cytoskeleton associated protein 2-like                                       | 150468    | 2,03  |
| up   | PMM2          | phosphomannomutase 2                                                         | 5373      | 2,03  |
| up   | LPCAT2        | lysophosphatidylcholine acyltransferase 2                                    | 54947     | 2,02  |
| up   | ALCAM         | activated leukocyte cell adhesion molecule                                   | 214       | 2,02  |
| up   | ASB6          | ankyrin repeat and SOCS box containing 6                                     | 140459    | 2,02  |
| up   | IGHJ3         | immunoglobulin heavy joining 3                                               | ---       | 2,02  |
| up   | TMEM14A       | transmembrane protein 14A                                                    | 28978     | 2,02  |
| up   | SH3D21        | SH3 domain containing 21                                                     | 79729     | 2,02  |
| up   | SCIN          | scinderin                                                                    | 85477     | 2,01  |
| up   | C6orf62       | chromosome 6 open reading frame 62                                           | 81688     | 2,01  |
| up   | SLC1A4        | solute carrier family 1 (glutamate/neutral amino acid transporter), member 4 | 6509      | 2,00  |
| down | LCE1C         | late cornified envelope 1C                                                   | 353133    | -2,00 |
| down | DCLK1         | doublecortin-like kinase 1                                                   | 9201      | -2,01 |
| down | NPC2          | Niemann-Pick disease, type C2                                                | 10577     | -2,01 |
| down | DKFZP434I0714 | uncharacterized protein DKFZP434I0714                                        | 54553     | -2,02 |
| down | OR2A14        | olfactory receptor, family 2, subfamily A, member 14                         | 135941    | -2,02 |
| down | CCL2          | chemokine (C-C motif) ligand 2                                               | 6347      | -2,03 |
| down | HERC2         | HECT and RLD domain containing E3 ubiquitin protein ligase 2                 | 8924      | -2,03 |
| down | PROS1         | protein S (alpha)                                                            | 5627      | -2,04 |
| down | AKAP12        | A kinase (PKA) anchor protein 12                                             | 9590      | -2,05 |
| down | CYBRD1        | cytochrome b reductase 1                                                     | 79901     | -2,05 |
| down | SNORD116-2    | small nucleolar RNA, C/D box 116-2                                           | 100033414 | -2,05 |
| down | REV3L         | REV3-like, polymerase (DNA directed), zeta, catalytic subunit                | 5980      | -2,06 |
| down | FADS1         | fatty acid desaturase 1                                                      | 3992      | -2,07 |
| down | AKR7L         | aldo-keto reductase family 7-like                                            | 246181    | -2,08 |



|      |           |                                                                                        |           |       |
|------|-----------|----------------------------------------------------------------------------------------|-----------|-------|
| down | IL6ST     | interleukin 6 signal transducer                                                        | 3572      | -2,08 |
| down | ARHGAP12  | Rho GTPase activating protein 12                                                       | 94134     | -2,09 |
| down | RAB29     | RAB29, member RAS oncogene family                                                      | 8934      | -2,10 |
| down | TP53INP1  | tumor protein p53 inducible nuclear protein 1                                          | 94241     | -2,10 |
| down | MIR21     | microRNA 21                                                                            | 406991    | -2,12 |
| down | MCL1      | myeloid cell leukemia 1                                                                | 4170      | -2,12 |
| down | DBET      | D4Z4 binding element transcript (non-protein coding)                                   | 100419743 | -2,12 |
| down | TPP1      | tripeptidyl peptidase I                                                                | 1200      | -2,12 |
| down | MTSS1L    | metastasis suppressor 1-like                                                           | 92154     | -2,13 |
| down | CLIC2     | chloride intracellular channel 2                                                       | 1193      | -2,14 |
| down | LSAMP     | limbic system-associated membrane protein                                              | 4045      | -2,14 |
| down | DUX4      | double homeobox 4                                                                      | 100288687 | -2,14 |
| down | IGSF10    | immunoglobulin superfamily, member 10                                                  | 285313    | -2,14 |
| down | SEMA3D    | sema domain, immunoglobulin domain (Ig), short basic domain, secreted, (semaphorin) 3D | 223117    | -2,14 |
| down | HEXB      | hexosaminidase B (beta polypeptide)                                                    | 3074      | -2,15 |
| down | TBC1D29   | TBC1 domain family, member 29                                                          | 26083     | -2,16 |
| down | SLC39A8   | solute carrier family 39 (zinc transporter), member 8                                  | 64116     | -2,17 |
| down | KRTAP10-5 | keratin associated protein 10-5                                                        | 386680    | -2,17 |
| down | SNED1     | sushi, nidogen and EGF-like domains 1                                                  | 25992     | -2,17 |
| down | ZNF480    | zinc finger protein 480                                                                | 147657    | -2,17 |
| down | FAP       | fibroblast activation protein, alpha                                                   | 2191      | -2,17 |
| down | ZNF600    | zinc finger protein 600                                                                | 162966    | -2,18 |
| down | C3        | complement component 3                                                                 | 718       | -2,18 |
| down | SVIL      | supervillin                                                                            | 6840      | -2,18 |
| down | LRIG3     | leucine-rich repeats and immunoglobulin-like domains 3                                 | 121227    | -2,19 |
| down | WLS       | wntless Wnt ligand secretion mediator                                                  | 79971     | -2,19 |
| down | SNX2      | sorting nexin 2                                                                        | 6643      | -2,20 |
| down | MDM2      | MDM2 proto-oncogene, E3 ubiquitin protein ligase                                       | 4193      | -2,21 |
| down | FAM20A    | family with sequence similarity 20, member A                                           | 54757     | -2,21 |
| down | ACVR2A    | activin A receptor, type IIA                                                           | 92        | -2,22 |
| down | JUNB      | jun B proto-oncogene                                                                   | 3726      | -2,22 |
| down | GALNT15   | polypeptide N-acetylgalactosaminyltransferase 15                                       | 117248    | -2,22 |
| down | SLC7A8    | solute carrier family 7 (amino acid transporter light chain, L system), member 8       | 23428     | -2,23 |
| down | GAA       | glucosidase, alpha; acid                                                               | 2548      | -2,23 |
| down | CLU       | clusterin                                                                              | 1191      | -2,24 |
| down | TGFBR3    | transforming growth factor, beta receptor III                                          | 7049      | -2,24 |
| down | DRAM1     | DNA-damage regulated autophagy modulator 1                                             | 55332     | -2,25 |
| down | MIR3620   | microRNA 3620                                                                          | 100500810 | -2,26 |
| down | CCNL1     | cyclin L1                                                                              | 57018     | -2,26 |

|      |          |                                                                                       |           |       |
|------|----------|---------------------------------------------------------------------------------------|-----------|-------|
| down | DCN      | decorin                                                                               | 1634      | -2,30 |
| down | PPAP2B   | phosphatidic acid phosphatase type 2B                                                 | 8613      | -2,34 |
| down | UBC      | ubiquitin C                                                                           | 7316      | -2,35 |
| down | SNORA70  | small nucleolar RNA, H/ACA box 70                                                     | 26778     | -2,36 |
| down | IGKV1-16 | immunoglobulin kappa variable 1-16                                                    | ---       | -2,37 |
| down | LGALS9B  | lectin, galactoside-binding, soluble, 9B                                              | 284194    | -2,39 |
| down | THBS2    | thrombospondin 2                                                                      | 7058      | -2,42 |
| down | SERPING1 | serpin peptidase inhibitor, clade G (C1 inhibitor), member 1                          | 710       | -2,43 |
| down | C1R      | complement component 1, r subcomponent                                                | 715       | -2,44 |
| down | CACNG8   | calcium channel, voltage-dependent, gamma subunit 8                                   | 59283     | -2,44 |
| down | APCDD1   | adenomatosis polyposis coli down-regulated 1                                          | 147495    | -2,45 |
| down | SCPEP1   | serine carboxypeptidase 1                                                             | 59342     | -2,49 |
| down | ZNF836   | zinc finger protein 836                                                               | 162962    | -2,49 |
| down | ZNF563   | zinc finger protein 563                                                               | 147837    | -2,50 |
| down | GAS1     | growth arrest-specific 1                                                              | 2619      | -2,51 |
| down | OR56A5   | olfactory receptor, family 56, subfamily A, member 5                                  | 390084    | -2,52 |
| down | ALDH3A2  | aldehyde dehydrogenase 3 family, member A2                                            | 224       | -2,54 |
| down | PCDHB7   | protocadherin beta 7                                                                  | 56129     | -2,54 |
| down | SRSF7    | serine/arginine-rich splicing factor 7                                                | 6432      | -2,54 |
| down | IFITM1   | interferon induced transmembrane protein 1                                            | 8519      | -2,56 |
| down | ZMYM6NB  | ZMYM6 neighbor                                                                        | 100506144 | -2,56 |
| down | OSR2     | odd-skipped related transcription factor 2                                            | 116039    | -2,56 |
| down | SAMHD1   | SAM domain and HD domain 1                                                            | 25939     | -2,59 |
| down | MAFB     | v-maf avian musculoaponeurotic fibrosarcoma oncogene homolog B                        | 9935      | -2,59 |
| down | SVEP1    | sushi, von Willebrand factor type A, EGF and pentraxin domain containing 1            | 79987     | -2,59 |
| down | SNORA72  | small nucleolar RNA, H/ACA box 72                                                     | 26775     | -2,60 |
| down | FLT3LG   | fms-related tyrosine kinase 3 ligand                                                  | 2323      | -2,61 |
| down | ABCC9    | ATP-binding cassette, sub-family C (CFTR/MRP), member 9                               | 10060     | -2,63 |
| down | SNORA11  | small nucleolar RNA, H/ACA box 11                                                     | 677799    | -2,66 |
| down | PPARGC1A | peroxisome proliferator-activated receptor gamma, coactivator 1 alpha                 | 10891     | -2,67 |
| down | SLC1A3   | solute carrier family 1 (glial high affinity glutamate transporter), member 3         | 6507      | -2,69 |
| down | SLC9A9   | solute carrier family 9, subfamily A (NHE9, cation proton antiporter 9), member 9     | 285195    | -2,76 |
| down | KIT      | v-kit Hardy-Zuckerman 4 feline sarcoma viral oncogene homolog                         | 3815      | -2,78 |
| down | TNFSF10  | tumor necrosis factor (ligand) superfamily, member 10                                 | 8743      | -2,81 |
| down | SFRP2    | secreted frizzled-related protein 2                                                   | 6423      | -2,83 |
| down | PTGS2    | prostaglandin-endoperoxide synthase 2 (prostaglandin G/H synthase and cyclooxygenase) | 5743      | -2,85 |

|      |             |                                                                                    |           |       |
|------|-------------|------------------------------------------------------------------------------------|-----------|-------|
| down | ADM         | adrenomedullin                                                                     | 133       | -2,92 |
| down | KCND2       | potassium voltage-gated channel, Shal-related subfamily, member 2                  | 3751      | -2,99 |
| down | ICAM1       | intercellular adhesion molecule 1                                                  | 3383      | -3,00 |
| down | SOX4        | SRY (sex determining region Y)-box 4                                               | 6659      | -3,00 |
| down | CTNS        | cystinosis, lysosomal cystine transporter                                          | 1497      | -3,07 |
| down | MYO1D       | myosin ID                                                                          | 4642      | -3,08 |
| down | MFAP4       | microfibrillar-associated protein 4                                                | 4239      | -3,08 |
| down | RRP7B       | ribosomal RNA processing 7 homolog B (S, cerevisiae)                               | 91695     | -3,12 |
| down | IL1R1       | interleukin 1 receptor, type I                                                     | 3554      | -3,15 |
| down | ZNF608      | zinc finger protein 608                                                            | 57507     | -3,18 |
| down | SMPDL3A     | sphingomyelin phosphodiesterase, acid-like 3A                                      | 10924     | -3,18 |
| down | LRRC32      | leucine rich repeat containing 32                                                  | 2615      | -3,20 |
| down | PDPN        | podoplanin                                                                         | 10630     | -3,20 |
| down | ADH1B       | alcohol dehydrogenase 1B (class I), beta polypeptide                               | 125       | -3,22 |
| down | PDGFR       | platelet-derived growth factor receptor-like                                       | 5157      | -3,36 |
| down | CDON        | cell adhesion associated, oncogene regulated                                       | 50937     | -3,39 |
| down | C1S         | complement component 1, s subcomponent                                             | 716       | -3,41 |
| down | KLF4        | Kruppel-like factor 4 (gut)                                                        | 9314      | -3,50 |
| down | FBLN1       | fibulin 1                                                                          | 2192      | -3,54 |
| down | PRELP       | proline/arginine-rich end leucine-rich repeat protein                              | 5549      | -3,55 |
| down | IL13RA2     | interleukin 13 receptor, alpha 2                                                   | 3598      | -3,61 |
| down | ABCA8       | ATP-binding cassette, sub-family A (ABC1), member 8                                | 10351     | -3,63 |
| down | FIBIN       | fin bud initiation factor homolog (zebrafish)                                      | 387758    | -3,67 |
| down | PLXNC1      | plexin C1                                                                          | 10154     | -3,76 |
| down | SECTM1      | secreted and transmembrane 1                                                       | 6398      | -3,78 |
| down | JUN         | jun proto-oncogene                                                                 | 3725      | -3,86 |
| down | GPNMB       | glycoprotein (transmembrane) nmb                                                   | 10457     | -3,86 |
| down | HSPA4L      | heat shock 70kDa protein 4-like                                                    | 22824     | -3,90 |
| down | SULF2       | sulfatase 2                                                                        | 55959     | -3,98 |
| down | PAPPA       | pregnancy-associated plasma protein A, pappalysin 1                                | 5069      | -4,00 |
| down | SNORD116-14 | small nucleolar RNA, C/D box 116-14                                                | 100033426 | -4,20 |
| down | FMOD        | fibromodulin                                                                       | 2331      | -4,21 |
| down | SLC40A1     | solute carrier family 40 (iron-regulated transporter), member 1                    | 30061     | -4,39 |
| down | NFKBIZ      | nuclear factor of kappa light polypeptide gene enhancer in B-cells inhibitor, zeta | 64332     | -4,39 |
| down | BRINP1      | bone morphogenetic protein/retinoic acid inducible neural-specific 1               | 1620      | -4,41 |
| down | TNXB        | tenascin XB                                                                        | 7148      | -4,51 |
| down | DPT         | dermatopontin                                                                      | 1805      | -4,59 |

|      |          |                                                                                                        |       |        |
|------|----------|--------------------------------------------------------------------------------------------------------|-------|--------|
| down | COLEC12  | collectin sub-family member 12                                                                         | 81035 | -4,82  |
| down | SERPINF1 | serpin peptidase inhibitor, clade F (alpha-2 antiplasmin, pigment epithelium derived factor), member 1 | 5176  | -5,09  |
| down | WISP2    | WNT1 inducible signaling pathway protein 2                                                             | 8839  | -5,56  |
| down | MME      | membrane metallo-endopeptidase                                                                         | 4311  | -5,74  |
| down | ANGPTL2  | angiopoietin-like 2                                                                                    | 23452 | -5,78  |
| down | PCSK7    | proprotein convertase subtilisin/kexin type 7                                                          | 9159  | -5,79  |
| down | RSPO3    | R-spondin 3                                                                                            | 84870 | -5,82  |
| down | DKK2     | dickkopf WNT signaling pathway inhibitor 2                                                             | 27123 | -6,02  |
| down | PTGDS    | prostaglandin D2 synthase 21kDa (brain)                                                                | 5730  | -6,09  |
| down | TMTC1    | transmembrane and tetratricopeptide repeat containing 1                                                | 83857 | -6,40  |
| down | RCAN2    | regulator of calcineurin 2                                                                             | 10231 | -6,64  |
| down | APOD     | apolipoprotein D                                                                                       | 347   | -7,50  |
| down | FOSB     | FBJ murine osteosarcoma viral oncogene homolog B                                                       | 2354  | -7,52  |
| down | CTSK     | cathepsin K                                                                                            | 1513  | -7,73  |
| down | FOS      | FBJ murine osteosarcoma viral oncogene homolog                                                         | 2353  | -7,77  |
| down | MMP1     | matrix metallopeptidase 1 (interstitial collagenase)                                                   | 4312  | -8,62  |
| down | PDGFD    | platelet derived growth factor D                                                                       | 80310 | -10,27 |
| down | ABCA6    | ATP-binding cassette, sub-family A (ABC1), member 6                                                    | 23460 | -14,56 |
| down | DPP4     | dipeptidyl-peptidase 4                                                                                 | 1803  | -15,95 |
| down | ABCA9    | ATP-binding cassette, sub-family A (ABC1), member 9                                                    | 10350 | -17,06 |
